# Supplementary material for: Synthesis and redox activity of carbene-coordinated group 13 metal radicals
Source: Royal Society of Chemistry journal article supplement (doi:10.1039/d2cc00216g), 2022-01-01
Supplement: d2cc00216g1.pdf [file d2cc00216g1.pdf]

## Electronic Supplementary Information

### **Synthesis and redox activity of carbene-coordinated group 13 metal radicals**

*Bin Li, Blaise L. Geoghegan, Hanns M. Weinert, Christoph Wölper, George E. Cutsail III, and  
Stephan Schulz\**

## Content

### 1. Experimental Section

#### 2. Spectroscopic Characterization (NMR, IR)

**Figure S1.**  $^1\text{H}$  NMR spectrum of **1**.

**Figure S2.**  $^{13}\text{C}\{^1\text{H}\}$  NMR spectrum of **1**.

**Figure S3.**  $^1\text{H}$  NMR spectrum of **5**.

**Figure S4.**  $^{19}\text{F}$  NMR spectrum of **5**.

**Figure S5.**  $^1\text{H}$  NMR spectrum of **6**.

**Figure S6.**  $^{13}\text{C}\{^1\text{H}\}$  NMR spectrum of **6**.

**Figure S7.**  $^1\text{H}$ - $^1\text{H}$  COSY NMR spectrum of **6**.

**Figure S8.**  $^1\text{H}$ - $^{13}\text{C}$  HSQC NMR spectrum of **6**.

**Figure S9.**  $^1\text{H}$ - $^{13}\text{C}$  HMBC NMR spectrum of **6**.

**Figure S10.**  $^{19}\text{F}$  NMR spectrum of **6**.

**Figure S11.**  $^{11}\text{B}$  NMR spectrum of **6**.

**Figure S12.** IR spectrum of **1**.

**Figure S13.** IR spectrum of **3**.

**Figure S14.** IR spectrum of **4**.

**Figure S15.** IR spectrum of **6**.

#### 3. Crystallographic Details

**Table S1.** Crystal data and structure refinement of **3-6** and **5S**.

**Table S2.** Selected bond lengths [ $\text{\AA}$ ] and angles [ $^\circ$ ] of the  $\text{C}_{\text{CAACM}}(\text{X}_2)\text{C}_{\text{IPr}}$  unit of **3-6** (calc. values).

**Figure S16 and S20.** Molecular structures of **3-6** and **5S**.

#### 4. EPR measurement

**Figure S21.** Simulated EPR spectra for various amounts of Al and N hyperfine coupling in the frozen solution regime.

**Figure S22.** Room temperature EPR spectrum of **3**.

#### 5. Cyclic Voltammetry measurement

**Figure S23.** Cyclic voltammogram for **3**, **4** and **6**.

#### 6. Computational Details

**Figure S24.** Biorthogonalized HOMO, SOMO and LUMO of **3** and **4** as well as the HOMO, LUMO and LUMO+1 of **5** and **6**.

**Table S3.** Calculated X–Y bond lengths, X and Y, NPA atomic charges, natural spin density, Wiberg bond indices (WBI), and NBO analysis of **3**.

**Table S4.** Calculated X–Y bond lengths, X and Y, NPA atomic charges, natural spin density, Wiberg bond indices (WBI), and NBO analysis of **4**.

**Table S5.** Calculated X–Y bond lengths, X and Y, NPA atomic charges, natural spin density, Wiberg bond indices (WBI), and NBO analysis of **5**.

**Table S6.** Calculated X–Y bond lengths, X and Y, NPA atomic charges, natural spin density, Wiberg bond indices (WBI), and NBO analysis of **6**.

**Table S7.** Cartesian coordinates of **3** [ $\text{\AA}$ ] for the optimized geometry at the M06-2X/def2-SVP level of theory.

**Table S8.** Cartesian coordinates of **4** [ $\text{\AA}$ ] for the optimized geometry at the M06-2X/def2-SVP level of theory.

**Table S9.** Cartesian coordinates of **5** [ $\text{\AA}$ ] for the optimized geometry at the M06-2X/def2-SVP level of theory.

**Table S10.** Cartesian coordinates of **6** [ $\text{\AA}$ ] for the optimized geometry at the M06-2X/def2-SVP level of theory.

**Table S11.** Cartesian coordinates of **3** [ $\text{\AA}$ ] optimized at the BP86/def2-TZVP level of theory.

**Table S12.** Cartesian coordinates of **4** [ $\text{\AA}$ ] optimized at the BP86/def2-TZVP level of theory.

#### 7. References

## 1. Experimental Section

**General procedure.** All manipulations were carried out under a dry argon or nitrogen atmosphere using Schlenk line and glovebox techniques. Toluene and *n*-hexane were dried by Braun solvent drying system and degassed to use. Fluorobenzene and deuterated dichloromethane were dried by stirring with CaH<sub>2</sub>. The NMR (<sup>1</sup>H, <sup>13</sup>C, <sup>19</sup>F and <sup>11</sup>B) spectra were recorded on Bruker Avance II 600 MHz and 500 MHz spectrometers. Elemental analysis was performed at the *Elementaranalyse Labor* of the University of Duisburg-Essen. IR spectra were reported by a Bruker ALPHA-T FT-IR spectrometer equipped with a single-reflection ATR sampling module. Cyclic voltammetry (CV) studies were performed in a glovebox using a Metrohm Autolab PGSTAT 204 potentiostat with a three electrodes setup consisting of a Pt disc (d = 1 mm) working electrode, Pt wire counter electrode, and Ag wire pseudo-reference electrode, and ferrocene as internal standard. Positive feedback compensation was utilized to reduce solvent resistance effects. Commercial reagents were purchased from Aldrich, Acros, or Alfa-Aesar Chemical Co. and used as received. <sup>i</sup>PrNHC,<sup>1</sup> cAAC,<sup>2</sup> and (cAAC)GaCl<sub>3</sub><sup>3</sup> were prepared according to the literatures.

**Synthesis of 1:** A mixture of <sup>Me</sup>cAAC (285 mg, 1 mmol) and AlBr<sub>3</sub> (267 mg, 1 mmol) was suspended in 20 mL of *n*-hexane, and stirred overnight, yielding a colourless solid that was isolated by filtration. Yield: 586 mg (90%). Mp: 220 °C. Anal. Calcd (%) for C<sub>20</sub>H<sub>31</sub>AlBr<sub>3</sub> (Mr = 552.16): C, 43.5; H, 5.66; N, 2.54. Found: C, 43.2; H, 5.01; N, 2.72. <sup>1</sup>H NMR (500 MHz, d<sup>8</sup>-toluene, 298K, ppm): δ = 0.83 (s, 6 H, CH<sub>3</sub>), 1.03 (d, <sup>3</sup>J<sub>HH</sub> = 5 Hz, 6 H, CHMe<sub>2</sub>), 1.34 (s, 2 H, CH<sub>2</sub>), 1.48 (d, <sup>3</sup>J<sub>HH</sub> = 8 Hz, 6 H, CHMe<sub>2</sub>), 1.65 (s, 6 H, CH<sub>3</sub>), 2.55 (sept, <sup>3</sup>J<sub>HH</sub> = 5 Hz, 2 H, CHMe<sub>2</sub>), 6.95–7.12 (m, 3 H, C<sub>6</sub>H<sub>3</sub>). <sup>13</sup>C NMR (125 MHz, d<sup>8</sup>-toluene, 298K, ppm): δ = 24.9, 27.0, 28.6, 29.2, 30.1, 50.8, 56.3, 82.3, 126.1, 131.0, 133.0, 145.4. **ATR-IR:** ν 2955, 2921, 2861, 1452, 1366, 1258, 1093, 1047, 1011, 801, 774 cm<sup>-1</sup>.

**Synthesis of 3:** <sup>Me</sup>cAAC(AlBr<sub>3</sub>) (276 mg, 0.5 mmol) was dissolved in 40 mL of toluene, and the solution was transferred to a stirred, cooled (–70 °C) mixture of <sup>i</sup>PrNHC (90 mg, 0.5 mmol) and KC<sub>8</sub> (135 mg, 1 mmol), and then the temperature was slowly raised up to room temperature. The suspension was stirred for 12 h, filtered and the resulting dark red filtrate concentrated to 4 mL and kept at 4 °C, yielding dark orange crystals after 24 h. Yield: 86 mg (26%). Melting point: Mp: 131 °C (dec.). Anal. Calcd (%) for C<sub>31</sub>H<sub>51</sub>N<sub>3</sub>AlBr<sub>2</sub> (Mr = 652.55): C, 57.1; H, 7.88; N, 6.44. Found: C, 57.2; H, 7.66; N, 6.67. **ATR-IR:** ν 2962, 2927, 2855, 1447, 1369, 1354, 1319, 1188, 1128, 1108, 903, 806, 770, 492 cm<sup>-1</sup>.

**Synthesis of 4:** <sup>Me</sup>cAAC(GaCl<sub>3</sub>) (231 mg, 0.5 mmol) was dissolved in 50 mL toluene, and the solution was transferred to a mixture of <sup>i</sup>PrNHC (90 mg, 0.5 mmol) and KC<sub>8</sub> (135 mg, 1 mmol) at -70 °C under stirring. The temperature was slowly raised up to room temperature and keep the stirring overnight. After filtration, the dark red filtrate was concentrated to 5 mL and kept at 4 °C. After 1 day, dark orange crystals were obtained. Yield: 97 mg (32%). Melting point: Mp: 124 °C (dec.). Anal. Calcd (%) for C<sub>31</sub>H<sub>51</sub>N<sub>3</sub>GaCl<sub>2</sub> (Mr = 606.39): C, 61.4; H, 8.48; N, 6.93. Found: C, 60.9; H, 8.40; N, 6.55. **ATR-IR:** ν 2965, 2939, 2863, 1441, 1375, 1360, 1329, 1199, 1133, 906, 809, 774 cm<sup>-1</sup>.

**Synthesis of 5 and 5S:** Compound **3** (69 mg, 0.11 mmol) and [Ph<sub>3</sub>C][B(C<sub>6</sub>F<sub>5</sub>)<sub>4</sub>] (97 mg, 0.11 mmol) were dissolved in benzene (5 mL) at ambient temperature, immediately giving a yellow solution that was stirred for

1 h. The solvent was removed in vacuo and the residue washed with *n*-hexane (5×2 mL) two times. The resulting pale brown solid was dissolved in fluorobenzene, and *n*-hexane was layered on the top. After keeping at ambient temperature for 2 days, tiny colourless crystals were formed, which still contained some by-products even after several recrystallization attempts, probably due to the instability of **5** in solution state. Therefore, **5** was only characterised by <sup>1</sup>H and <sup>19</sup>F NMR spectroscopy. **<sup>1</sup>H NMR (400 MHz, CD<sub>2</sub>Cl<sub>2</sub>)** δ = 1.38 (d, <sup>3</sup>J<sub>HH</sub> = 4.0 Hz, 6H, CHMe<sub>2</sub>), 1.39 (d, <sup>3</sup>J<sub>HH</sub> = 8.0 Hz, 6H, CHMe<sub>2</sub>), 1.47 (s, 6H, CMe<sub>2</sub>), 1.54 (d, <sup>3</sup>J<sub>HH</sub> = 8.0 Hz, 12H, CHMe<sub>2</sub>), 1.56 (s, 6H, CMe<sub>2</sub>), 2.15 (s, 2H, CH<sub>2</sub>), 2.36 (s, 6H, CMe), 2.74 (sept, <sup>3</sup>J<sub>HH</sub> = 8.0 Hz, 2H, CHMe<sub>2</sub>), 5.40 (sept, <sup>3</sup>J<sub>HH</sub> = 8.0 Hz, 2H, CHMe<sub>2</sub>), 7.37-7.65 (m, 3H, C<sub>6</sub>H<sub>3</sub>). **<sup>19</sup>F NMR (376 MHz, CD<sub>2</sub>Cl<sub>2</sub>)** δ = -133.1(m, 8F, *o*-F), -163.8 (t, <sup>3</sup>J<sub>FF</sub> = 22.6 Hz, 4F, *p*-F), -167.6 (m, 8F, *m*-F). (Note: [cAAC-H][B(C<sub>6</sub>F<sub>5</sub>)<sub>4</sub>] (**5S**) was identified as one of the side-products by single crystal X-ray diffraction).

**Synthesis of 6:** Compound **4** (70 mg, 0.12 mmol) and [Ph<sub>3</sub>C][B(C<sub>6</sub>F<sub>5</sub>)<sub>4</sub>] (107 mg, 0.12 mmol) were dissolved in toluene (5 mL) under stirring at ambient temperature, yielding a yellow solution that was stirred for 12 h. After removing the solvent in vacuo, the residue was washed with *n*-hexane (5×2 mL) two times and the resulting yellow solid was dried. Yield: 122 mg (82%). Single crystal suitable for X-ray diffraction were obtained by layering *n*-hexane on the top of fluorobenzene solution. Melting point: 236 °C (dec.). Anal. calcd. (%) for C<sub>55</sub>H<sub>51</sub>N<sub>3</sub>GaCl<sub>2</sub>BF<sub>20</sub> (Mr = 1285.44): C, 51.4; H, 4.00; N, 3.26. Found: C, 52.0; H, 3.84; N, 3.11. **<sup>1</sup>H NMR (600 MHz, CD<sub>2</sub>Cl<sub>2</sub>)** δ = 1.35 (d, <sup>3</sup>J<sub>HH</sub> = 6.0 Hz, 6H, CHMe<sub>2</sub>), 1.38 (d, <sup>3</sup>J<sub>HH</sub> = 6.0 Hz, 6H, CHMe<sub>2</sub>), 1.48 (s, 6H, CMe<sub>2</sub>), 1.53 (s, 6H, CMe<sub>2</sub>), 1.54 (d, <sup>3</sup>J<sub>HH</sub> = 6.0 Hz, 12H, CHMe<sub>2</sub>), 2.20 (s, 2H, CH<sub>2</sub>), 2.34 (s, 6H, CMe), 2.70 (sept, <sup>3</sup>J<sub>HH</sub> = 6.0 Hz, 2H, CHMe<sub>2</sub>), 5.27 (sept, <sup>3</sup>J<sub>HH</sub> = 6.0 Hz, 2H, CHMe<sub>2</sub>), 7.38 (d, <sup>3</sup>J<sub>HH</sub> = 6.0 Hz, 2H, *m*-ArH), 7.54 (t, <sup>3</sup>J<sub>HH</sub> = 6.0 Hz, 1H, *p*-ArH). **<sup>13</sup>C{<sup>1</sup>H} NMR (150 MHz, CD<sub>2</sub>Cl<sub>2</sub>)** δ = 11.2, 21.9, 25.6, 27.4, 29.4, 29.7, 29.8, 50.2, 55.7, 87.2, 126.6, 130.8, 131.5, 136.0, 137.7, 145.3, 147.9, 149.5, 153.0 (carbene carbon in <sup>*i*</sup>PrNHC), 225.1 (carbene carbon in <sup>*Me*</sup>cAAC). **<sup>19</sup>F NMR (565 MHz, CD<sub>2</sub>Cl<sub>2</sub>)** δ = -133.1(m, 8F, *o*-F), -163.8 (t, <sup>3</sup>J<sub>FF</sub> = 33.9 Hz, 4F, *p*-F), -167.6 (m, 8F, *m*-F). **<sup>11</sup>B NMR (192 MHz, CD<sub>2</sub>Cl<sub>2</sub>)** δ = -16.7. ATR-IR: ν 2987, 1642, 1511, 1461, 1387, 1374, 1272, 1084, 978, 774, 755, 683, 659, 574 cm<sup>-1</sup>.

## 2. Spectroscopic Characterization (NMR, IR)

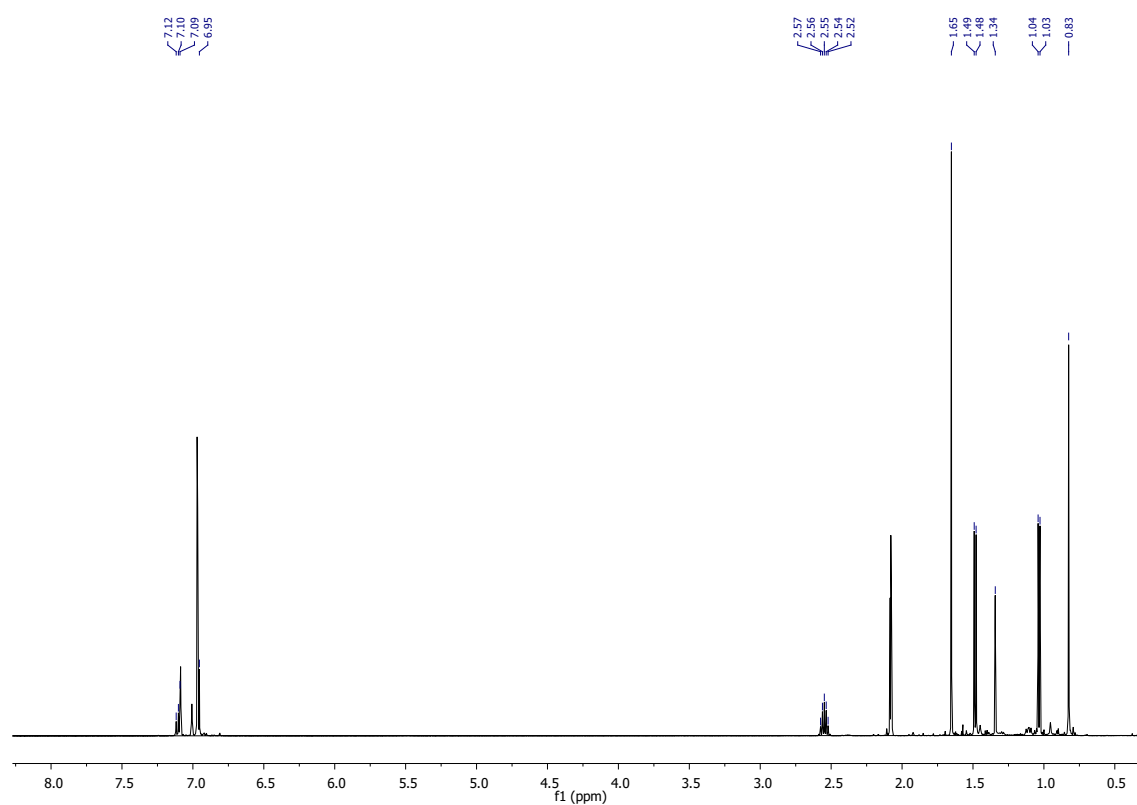

Figure S1.  $^1\text{H}$  NMR spectrum of **1** in  $d^8$ -toluene at 298K.

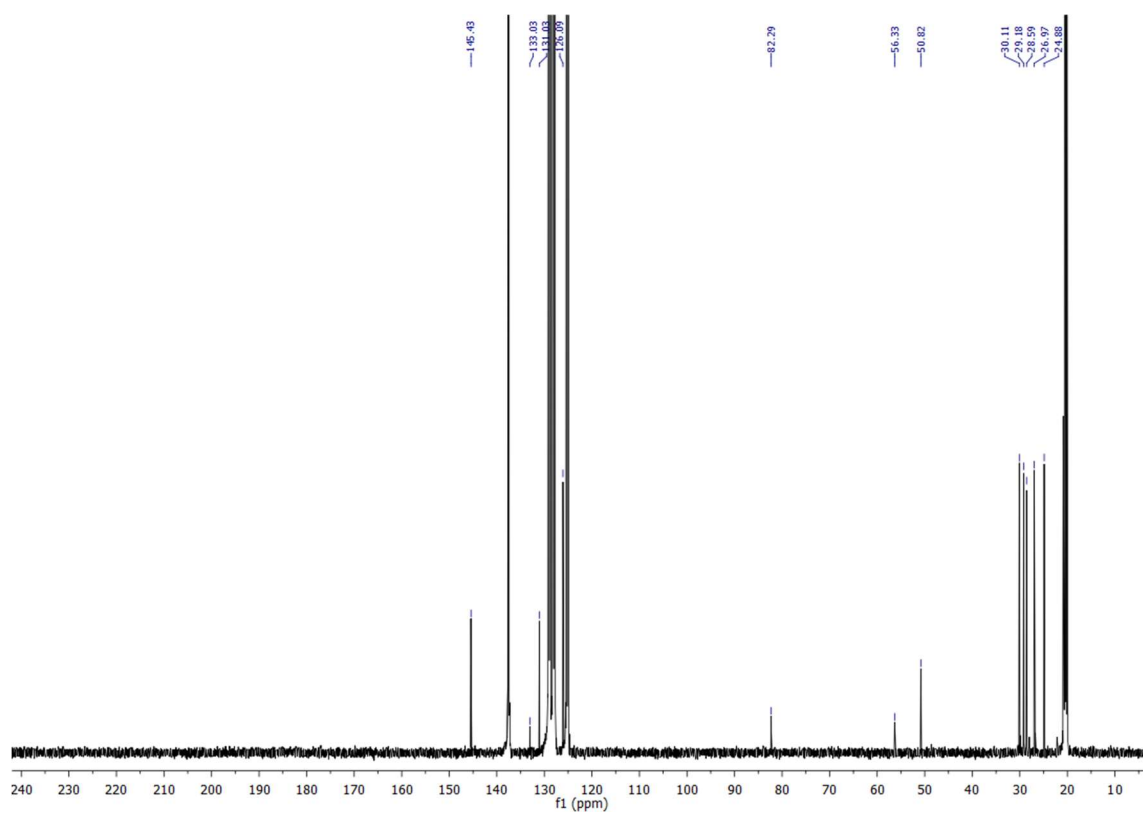

Figure S2.  $^{13}\text{C}\{^1\text{H}\}$  NMR spectrum of **1** in  $d^8$ -toluene at 298K.

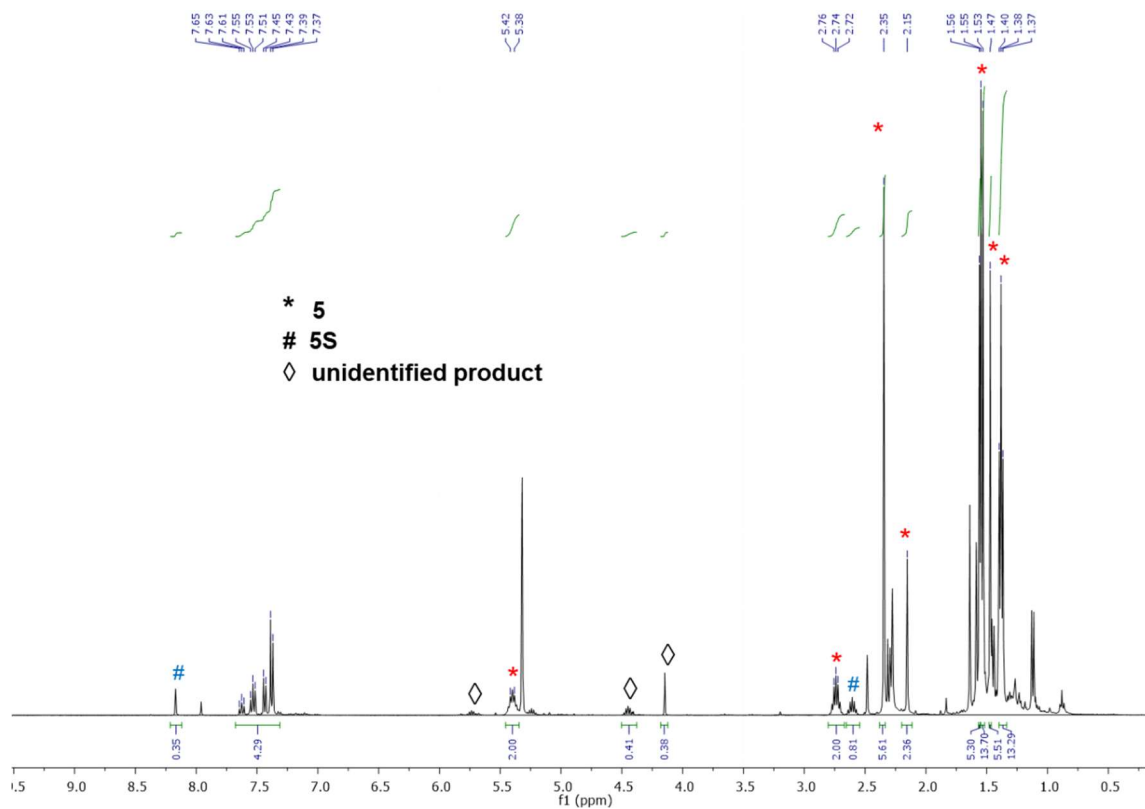

Figure S3.  $^1\text{H}$  NMR spectrum of **5** in  $\text{CD}_2\text{Cl}_2$  at 298K.

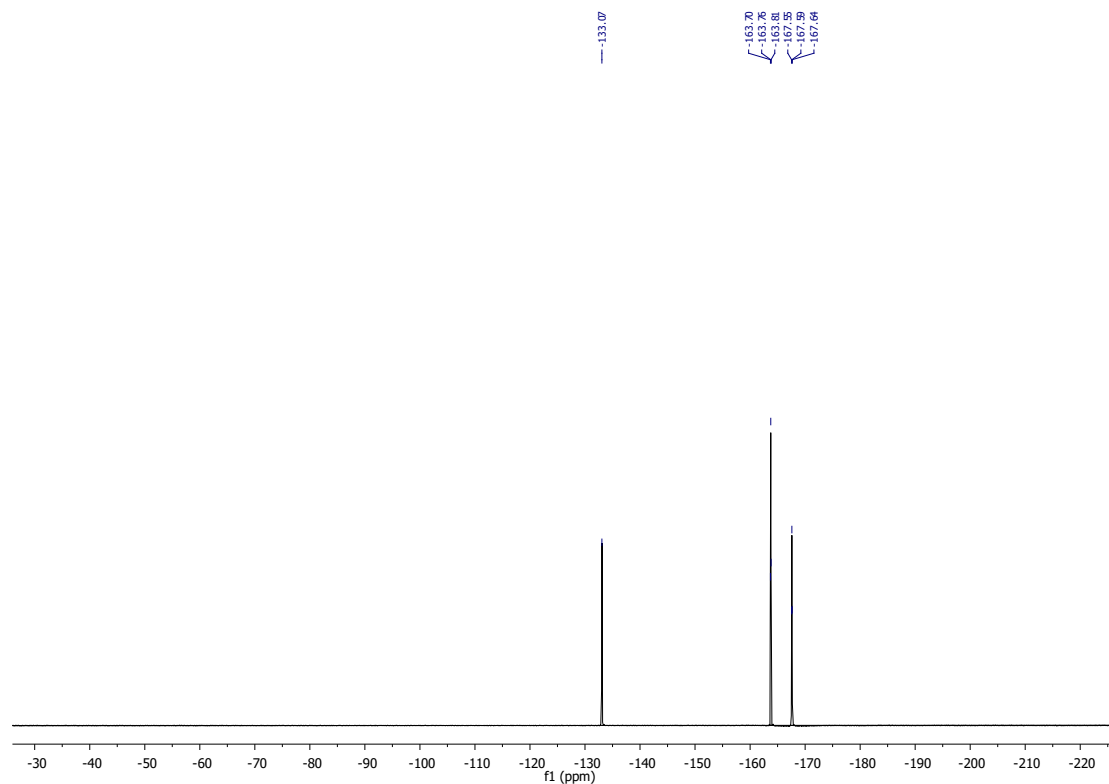

Figure S4.  $^{19}\text{F}$  NMR spectrum of **5** in  $\text{CD}_2\text{Cl}_2$  at 298K.

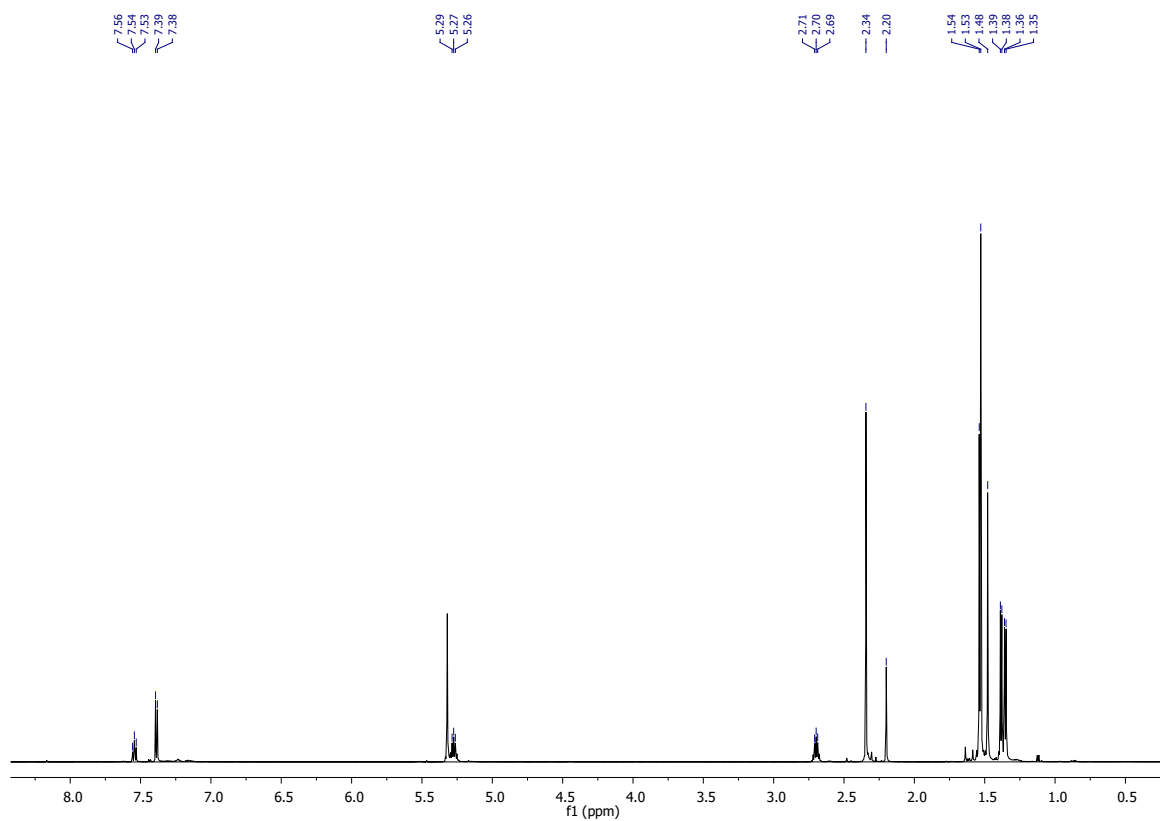

Figure S5.  $^1\text{H}$  NMR spectrum of **6** in  $\text{CD}_2\text{Cl}_2$  at 298K.

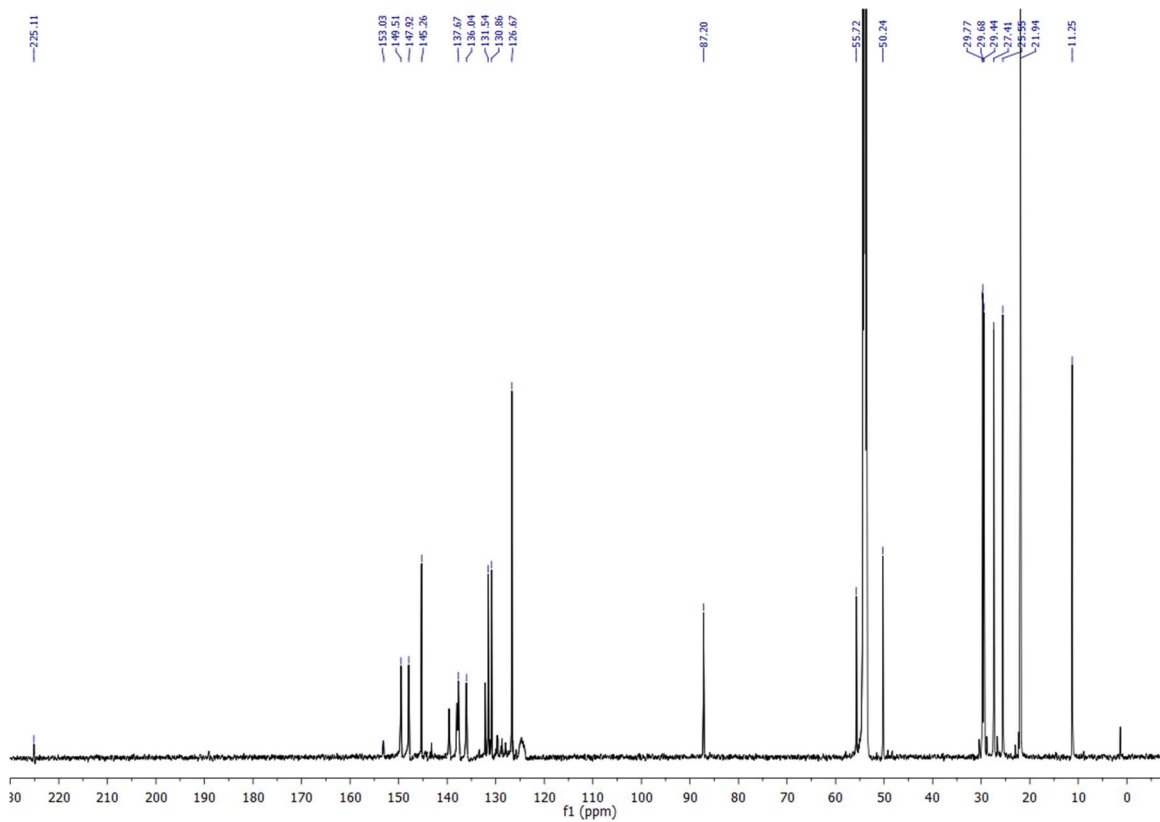

Figure S6.  $^{13}\text{C}\{^1\text{H}\}$  NMR spectrum of **6** in  $\text{CD}_2\text{Cl}_2$  at 298K.

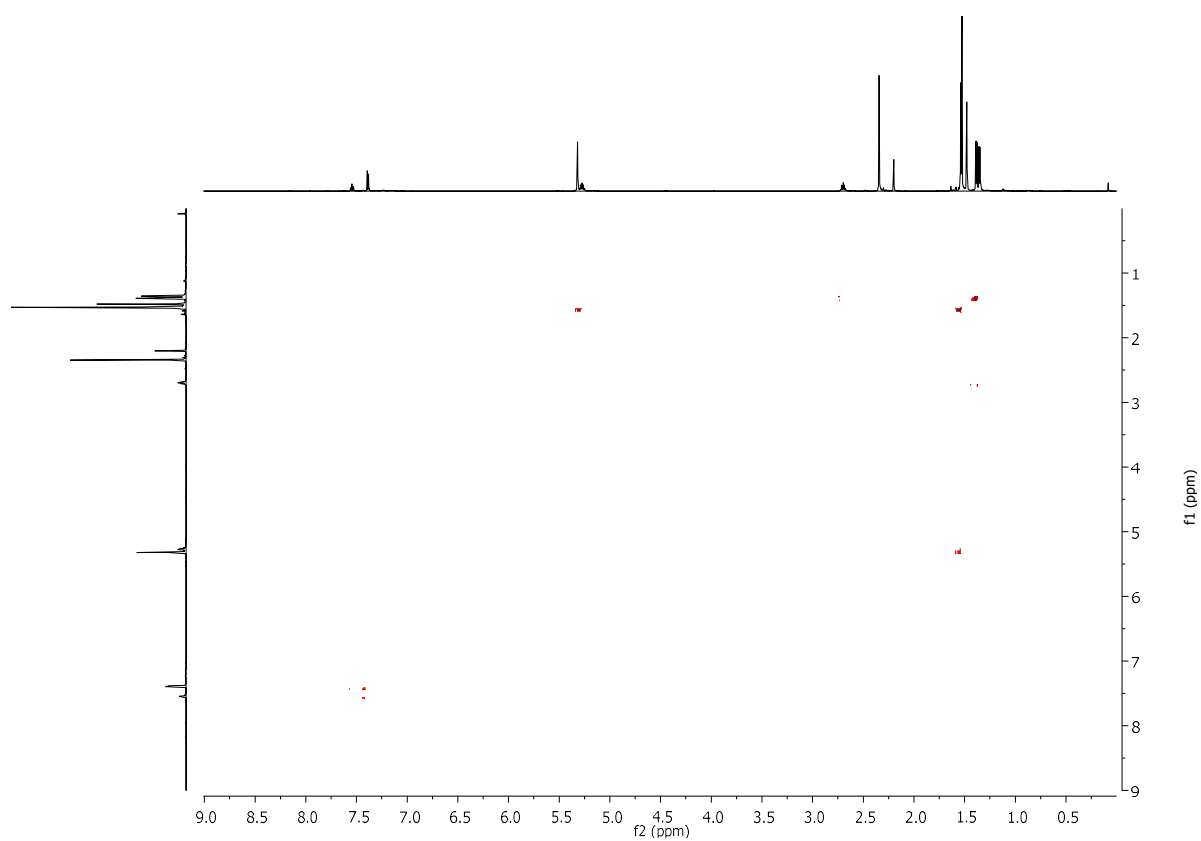

**Figure S7.**  $^1\text{H}$ - $^1\text{H}$  COSY NMR spectrum of **6** in  $\text{CD}_2\text{Cl}_2$  at 298K.

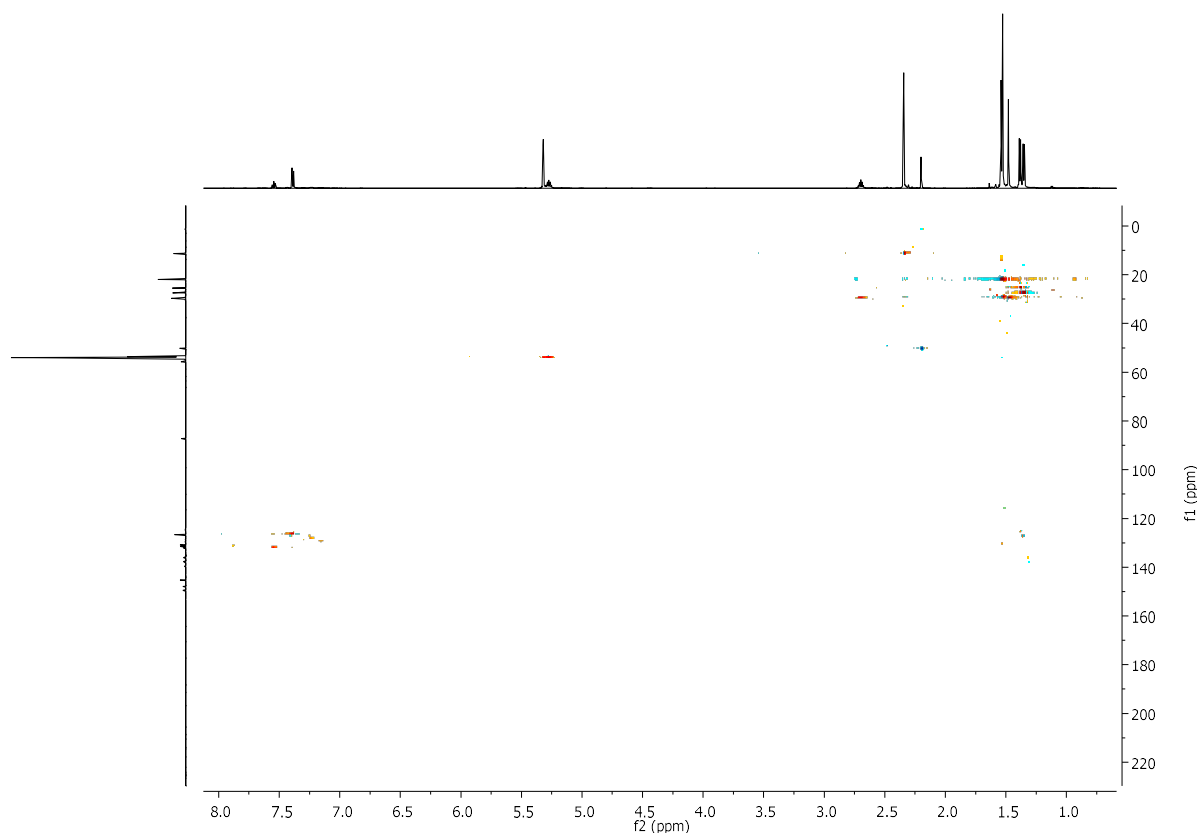

**Figure S8.**  $^1\text{H}$ - $^{13}\text{C}$  HSQC NMR spectrum of **6** in  $\text{CD}_2\text{Cl}_2$  at 298K.



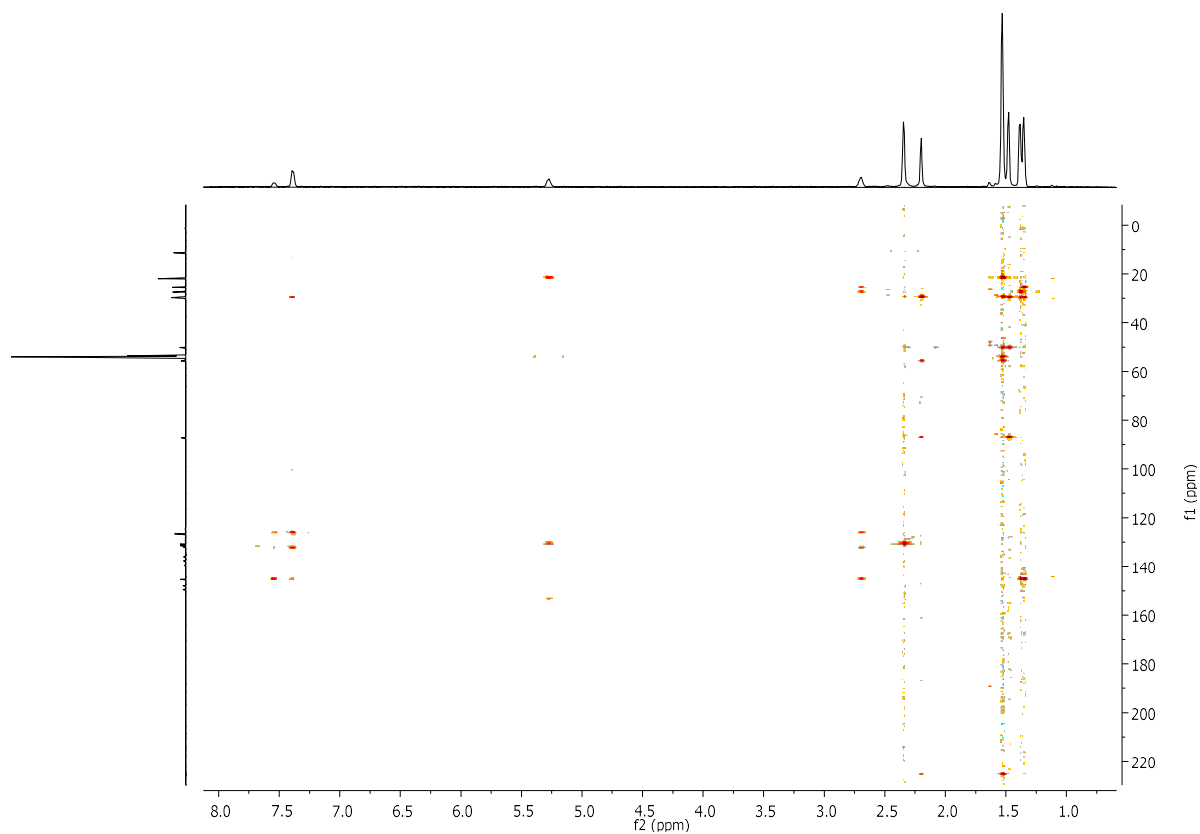

Figure S9.  $^1\text{H}$ - $^{13}\text{C}$  HMBC NMR spectrum of **6** in  $\text{CD}_2\text{Cl}_2$  at 298K.

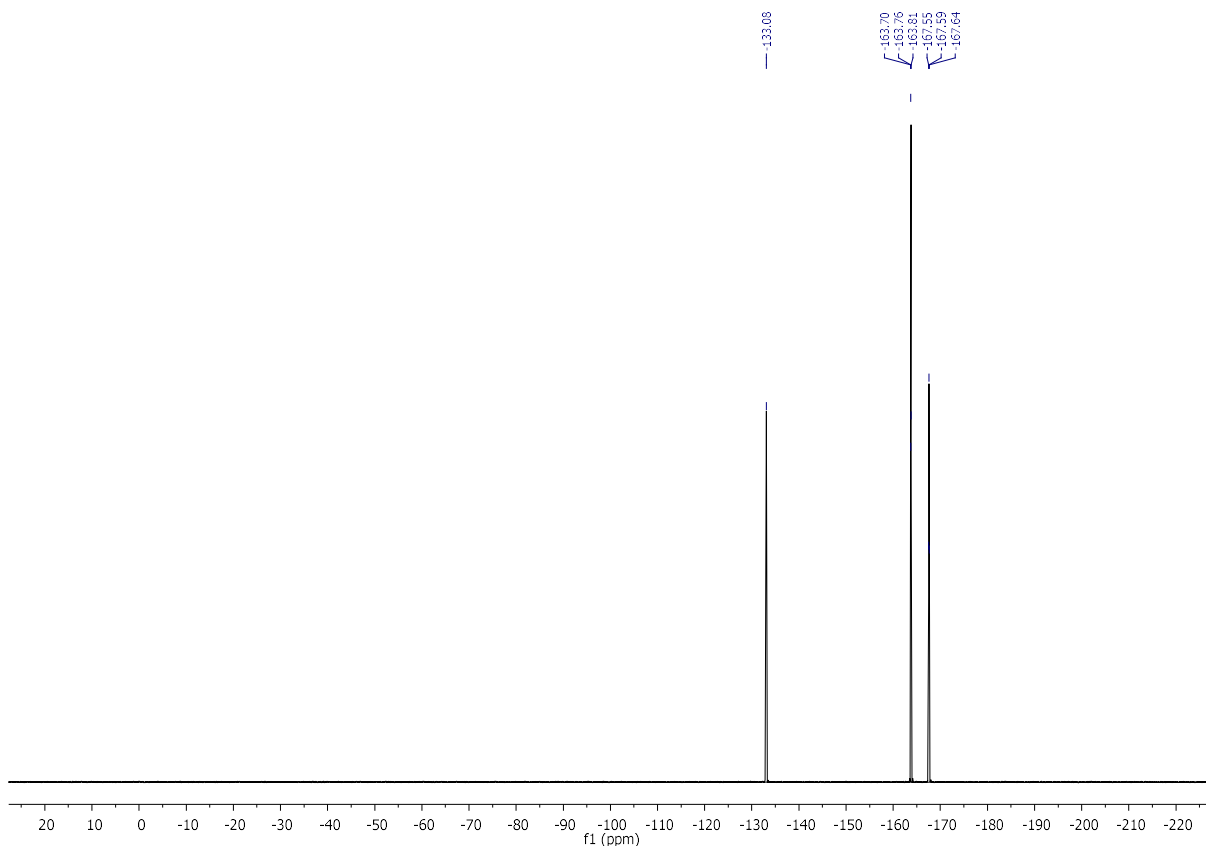

Figure S10.  $^{19}\text{F}$  NMR spectrum of **6** in  $\text{CD}_2\text{Cl}_2$  at 298K.

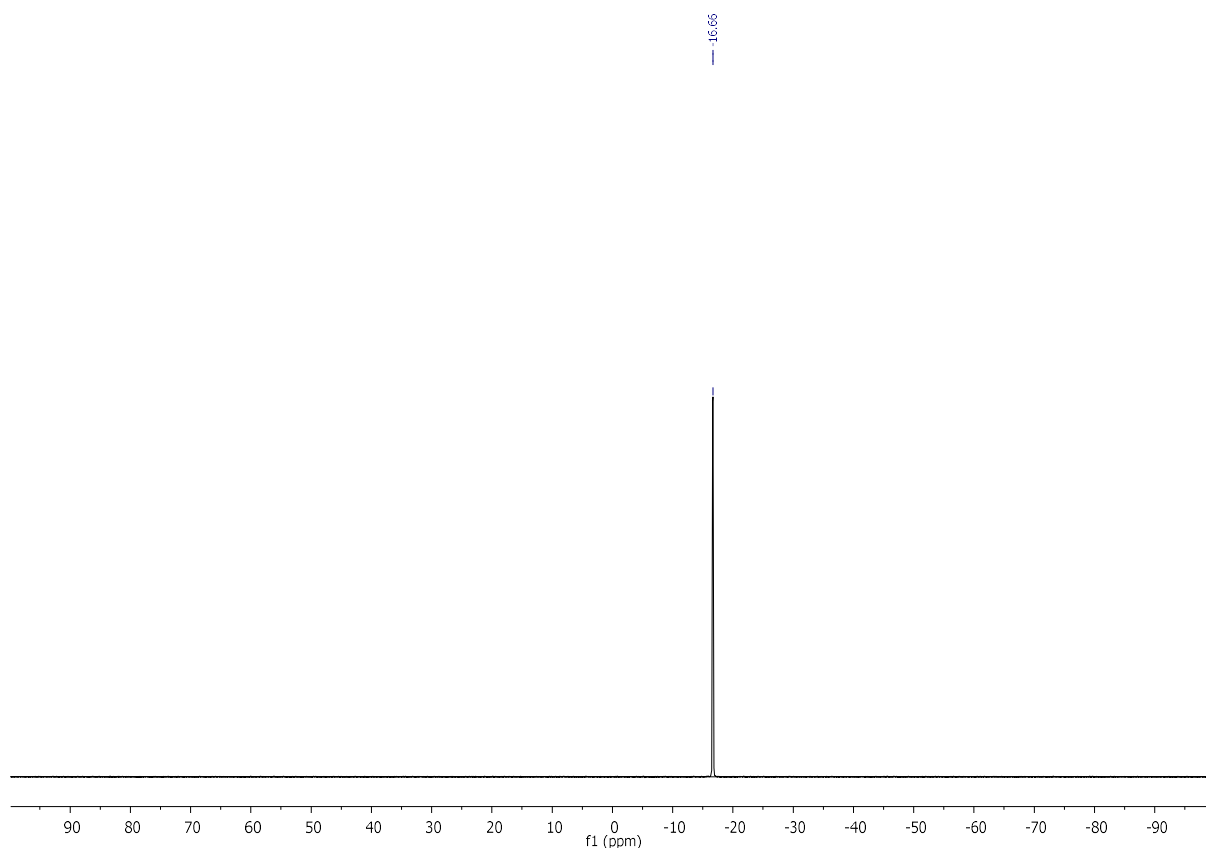

Figure S11.  $^{11}\text{B}$  NMR spectrum of **6** in  $\text{CD}_2\text{Cl}_2$  at 298K.

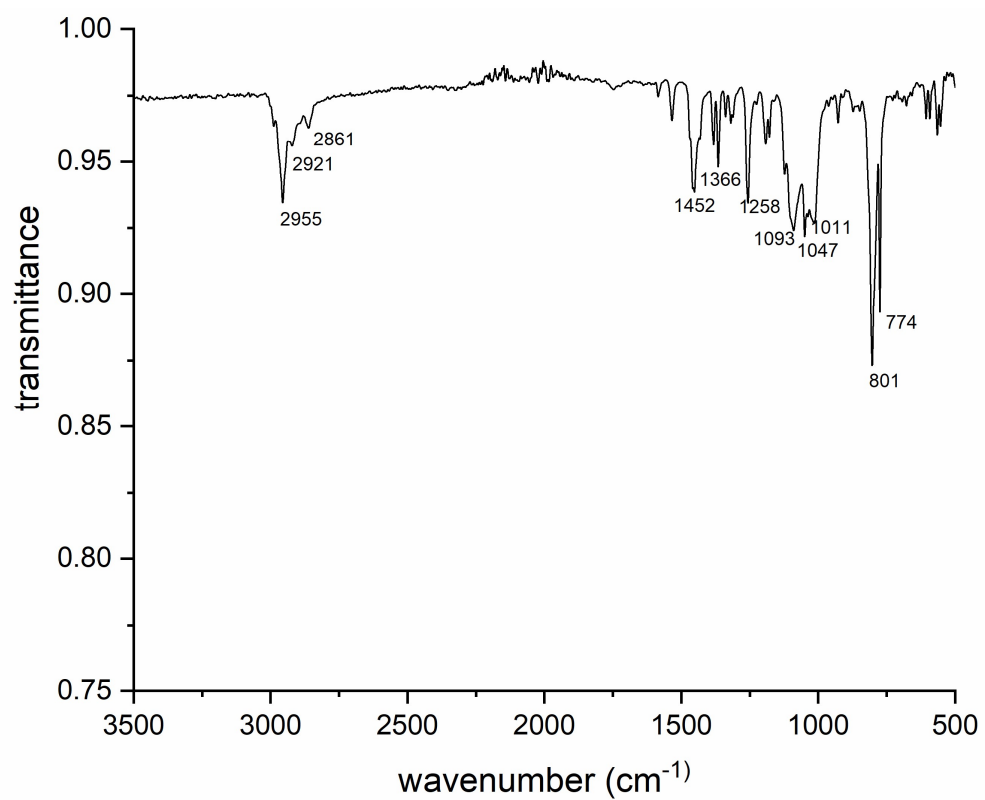

Figure S12. Infrared resonance spectrum of **1**.

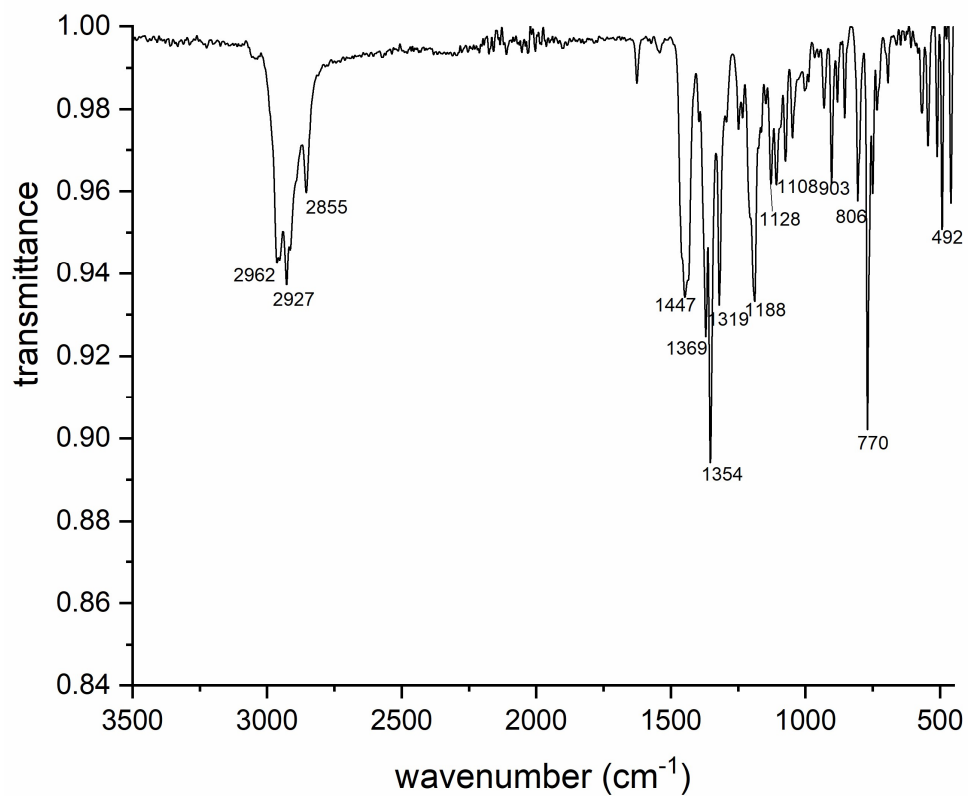

Figure S13. Infrared resonance spectrum of 3.

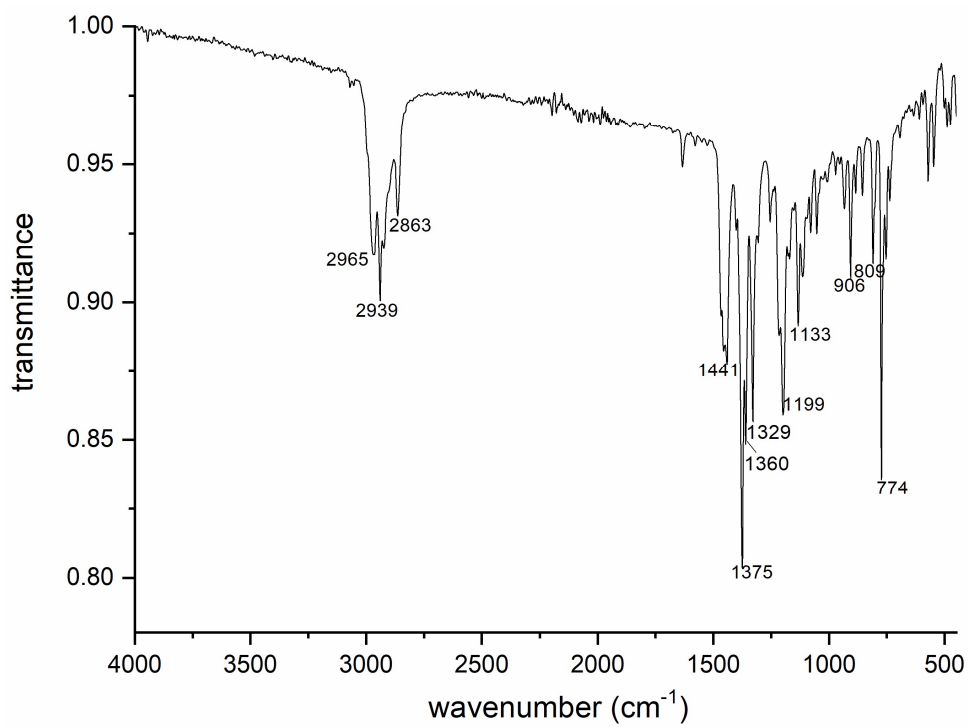

Figure S14. Infrared resonance spectrum of 4.

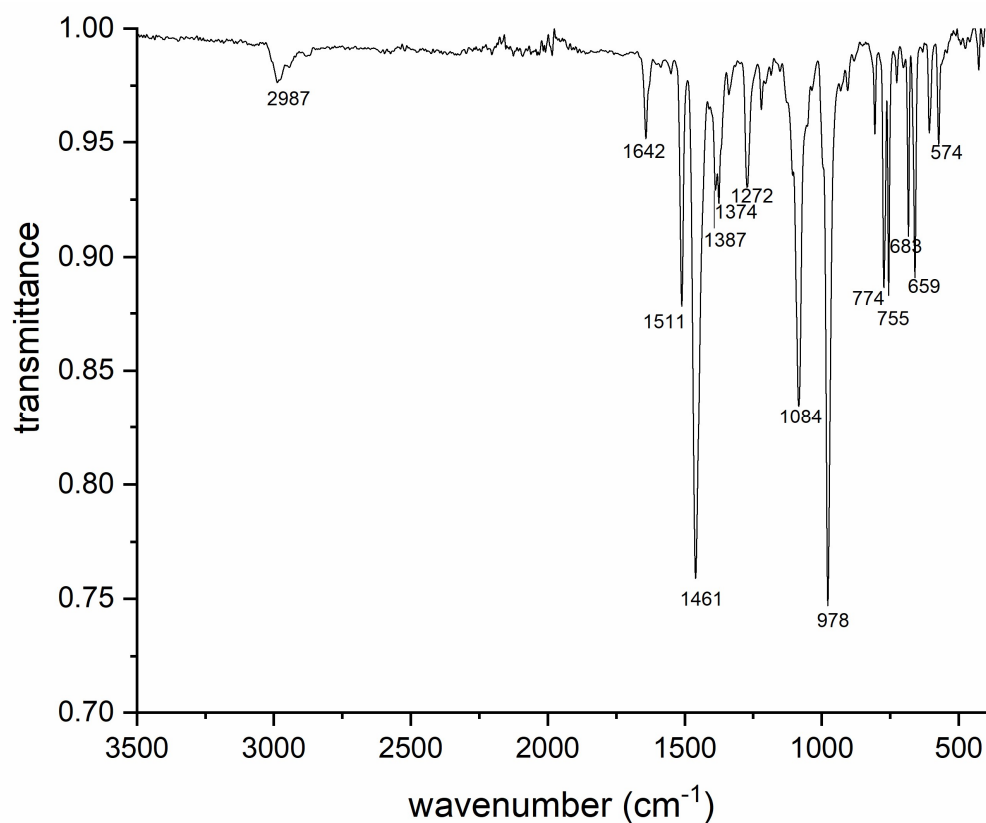

**Figure S15.** Infrared resonance spectrum of **6**.

### 3. Crystallographic Details

The crystals were mounted on nylon loops in inert oil. Data of **3**, **4**, **5**, **5S** were collected on a Bruker AXS D8 Kappa diffractometer with APEX2 detector (mono-chromated MoK $\alpha$  radiation,  $\lambda = 0.71073$  Å) those of **6** on a Bruker AXS D8 Venture diffractometer with Photon II detector (mono-chromated CuK $\alpha$  radiation,  $\lambda = 1.54178$  Å, microfocus source) at 100(2) K. The structures were solved by Direct Methods (SHELXS-97)<sup>4</sup> and refined anisotropically by full-matrix least-squares on  $F^2$  (SHELXL-2017)<sup>5,6</sup>. Absorption corrections were performed semi-empirically from equivalent reflections on basis of multi-scans (Bruker AXS APEX3). Hydrogen atoms were refined using a riding model or rigid methyl groups. The crystal of **4** was a two component non-merohedral twin and the model was refined against de-twinned HKLF4 data.

CCDC-2129477 (**3**), -2129478 (**4**), -2129479 (**5**), -2129480 (**5S**), and -2129481 (**6**) contain the supplementary crystallographic data for this paper. These data can be obtained free of charge from The Cambridge Crystallographic Data Centre via [www.ccdc.cam.ac.uk/data\\_request/cif](http://www.ccdc.cam.ac.uk/data_request/cif).

**Table S1:** Crystallographic data of compounds **3-6**.

| Ident. code                                                  | <b>3</b>                                                         | <b>4</b>                                                         | <b>5</b>                                                                          | <b>5S</b>                                                         | <b>6</b>                                                                          |
|--------------------------------------------------------------|------------------------------------------------------------------|------------------------------------------------------------------|-----------------------------------------------------------------------------------|-------------------------------------------------------------------|-----------------------------------------------------------------------------------|
| Emp. formula                                                 | C <sub>31</sub> H <sub>51</sub> Br <sub>2</sub> AlN <sub>3</sub> | C <sub>31</sub> H <sub>51</sub> Cl <sub>2</sub> GaN <sub>3</sub> | C <sub>55</sub> H <sub>51</sub> BBr <sub>2</sub> F <sub>20</sub> AlN <sub>3</sub> | C <sub>44</sub> H <sub>32</sub> BF <sub>20</sub> N                | C <sub>55</sub> H <sub>51</sub> BCl <sub>2</sub> F <sub>20</sub> GaN <sub>3</sub> |
| <i>M</i>                                                     | 652.54                                                           | 606.36                                                           | 1331.59                                                                           | 965.51                                                            | 1285.41                                                                           |
| Crystal size [mm]                                            | 0.344 × 0.202 × 0.178                                            | 0.470 × 0.450 × 0.320                                            | 0.392 × 0.184 × 0.171                                                             | 0.737 × 0.388 × 0.133                                             | 0.184 × 0.130 × 0.027                                                             |
| <i>T</i> [K]                                                 | 100(2)                                                           | 100(2)                                                           | 100(2)                                                                            | 100(2)                                                            | 100(2)                                                                            |
| Cryst. system                                                | monoclinic                                                       | monoclinic                                                       | monoclinic                                                                        | Orthorhombic                                                      | monoclinic                                                                        |
| Space group                                                  | <i>P</i> 2 <sub>1</sub> / <i>c</i>                               | <i>P</i> 2 <sub>1</sub> / <i>c</i>                               | <i>P</i> 2 <sub>1</sub> / <i>n</i>                                                | <i>P</i> 2 <sub>1</sub> 2 <sub>1</sub> 2 <sub>1</sub>             | <i>P</i> 2 <sub>1</sub> / <i>c</i>                                                |
| <i>a</i> [Å]                                                 | 14.9332(16)                                                      | 15.157(6)                                                        | 17.3212(16)                                                                       | 14.3008(19)                                                       | 9.3349(4)                                                                         |
| <i>b</i> [Å]                                                 | 10.7999(12)                                                      | 10.928(4)                                                        | 17.0220(16)                                                                       | 14.7881(19)                                                       | 19.9338(9)                                                                        |
| <i>c</i> [Å]                                                 | 20.545(2)                                                        | 20.000(7)                                                        | 19.1672(18)                                                                       | 19.075(3)                                                         | 29.6976(13)                                                                       |
| $\alpha$ [°]                                                 | 90                                                               | 90                                                               | 90                                                                                | 90                                                                | 90                                                                                |
| $\beta$ [°]                                                  | 90.806(2)                                                        | 90.064(7)                                                        | 101.493(3)                                                                        | 90                                                                | 93.9233(14)                                                                       |
| $\gamma$ [°]                                                 | 90                                                               | 90                                                               | 90                                                                                | 90                                                                | 90                                                                                |
| <i>V</i> [Å <sup>3</sup> ]                                   | 3313.1(6)                                                        | 3313(2)                                                          | 5538.0(9)                                                                         | 4034.1(9)                                                         | 5513.2(4)                                                                         |
| <i>Z</i>                                                     | 4                                                                | 4                                                                | 4                                                                                 | 4                                                                 | 4                                                                                 |
| <i>D</i> <sub>calc</sub> [g·cm <sup>-3</sup> ]               | 1.308                                                            | 1.216                                                            | 1.597                                                                             | 1.590                                                             | 1.549                                                                             |
| $\mu$ [(mm <sup>-1</sup> )]                                  | 2.496                                                            | 1.015                                                            | 1.588                                                                             | 0.157                                                             | 2.552                                                                             |
| Transmissions                                                | 0.75/0.57                                                        | 0.75/0.59                                                        | 0.75/0.61                                                                         | 0.75/0.66                                                         | 0.75/0.61                                                                         |
| <i>F</i> (000)                                               | 1364                                                             | 1292                                                             | 2680                                                                              | 1952                                                              | 2608                                                                              |
| Index ranges                                                 | -24 ≤ <i>h</i> ≤ 24<br>18 ≤ <i>k</i> ≤ 18<br>-34 ≤ <i>l</i> ≤ 34 | -21 ≤ <i>h</i> ≤ 21<br>0 ≤ <i>k</i> ≤ 15<br>0 ≤ <i>l</i> ≤ 29    | -26 ≤ <i>h</i> ≤ 26<br>-26 ≤ <i>k</i> ≤ 26<br>-29 ≤ <i>l</i> ≤ 29                 | -22 ≤ <i>h</i> ≤ 22<br>-22 ≤ <i>k</i> ≤ 22<br>-29 ≤ <i>l</i> ≤ 29 | -11 ≤ <i>h</i> ≤ 11<br>-24 ≤ <i>k</i> ≤ 25<br>-37 ≤ <i>l</i> ≤ 38                 |
| $\vartheta$ <sub>max</sub> [°]                               | 36.385                                                           | 32.524                                                           | 33.336                                                                            | 33.288                                                            | 80.893                                                                            |
| Refl. collected                                              | 179562                                                           | 85326                                                            | 218986                                                                            | 144712                                                            | 213348                                                                            |
| Independ. refl.                                              | 16101                                                            | 10289                                                            | 21310                                                                             | 15513                                                             | 12053                                                                             |
| <i>R</i> <sub>int</sub>                                      | 0.0564                                                           | 0.0496                                                           | 0.0576                                                                            | 0.0498                                                            | 0.0396                                                                            |
| Ref. params.                                                 | 348                                                              | 348                                                              | 753                                                                               | 603                                                               | 753                                                                               |
| <i>R</i> <sub>1</sub> [ <i>I</i> > 2σ( <i>I</i> )]           | 0.0346                                                           | 0.0659                                                           | 0.0331                                                                            | 0.0411                                                            | 0.0262                                                                            |
| <i>wR</i> <sub>2</sub> [ <i>I</i> > 2σ( <i>I</i> )]          | 0.0761                                                           | 0.1394                                                           | 0.0743                                                                            | 0.0954                                                            | 0.0698                                                                            |
| <i>R</i> <sub>1</sub> [all data]                             | 0.0575                                                           | 0.1228                                                           | 0.0546                                                                            | 0.0538                                                            | 0.0277                                                                            |
| <i>wR</i> <sub>2</sub> [all data]                            | 0.0843                                                           | 0.1555                                                           | 0.0818                                                                            | 0.1031                                                            | 0.0710                                                                            |
| <i>x</i> (Flack)                                             |                                                                  |                                                                  |                                                                                   | -0.05(7)                                                          |                                                                                   |
| Goof                                                         | 1.025                                                            | 1.074                                                            | 1.019                                                                             | 1.051                                                             | 1.027                                                                             |
| $\Delta\rho$ <sub>final</sub> (max/min) [e·Å <sup>-3</sup> ] | 1.823/-1.491                                                     | 0.546/-0.438                                                     | 0.640/-0.671                                                                      | 0.629/-0.263                                                      | 0.349/-0.432                                                                      |

**Table S2.** Selected bond lengths [Å] and angles [°] of the C<sub>CAAC</sub>M(X)<sub>2</sub>C<sub>IPr</sub> unit of **3–6** (calc. values).

|                     | <b>3</b>              | <b>4</b>              | <b>5</b>              | <b>6</b>              |
|---------------------|-----------------------|-----------------------|-----------------------|-----------------------|
| M-X <sub>1</sub>    | 2.3603(4)<br>(2.3708) | 2.221(1)<br>(2.237)   | 2.2824(4)<br>(2.2895) | 2.1798(3)<br>(2.1982) |
| M-X <sub>2</sub>    | 2.3462(4)<br>(2.3407) | 2.249(2)<br>(2.2692)  | 2.2934(5)<br>(2.3171) | 2.2042(3)<br>(2.2209) |
| M-C <sub>CAAC</sub> | 1.941(1)<br>(1.941)   | 1.932(3)<br>(1.958)   | 2.055(1)<br>(2.055)   | 2.037(1)<br>(2.063)   |
| M-C <sub>IPr</sub>  | 2.078(1)<br>(2.106)   | 2.059(3)<br>(2.115)   | 2.047(1)<br>(2.065)   | 2.026(1)<br>(2.070)   |
| X-M-X               | 101.08(2)<br>(104.88) | 100.68(5)<br>(105.89) | 106.79(2)<br>(109.61) | 106.63(2)<br>(110.73) |
| C-M-C               | 113.20(5)<br>(110.61) | 116.78(1)<br>(112.47) | 117.12(5)<br>(109.89) | 117.59(5)<br>(112.65) |

For **3** and **5** M: Al; X: Br. For **4** and **6** M: Ga; X: Cl. M06-2X/def2-SVP(D3zero)

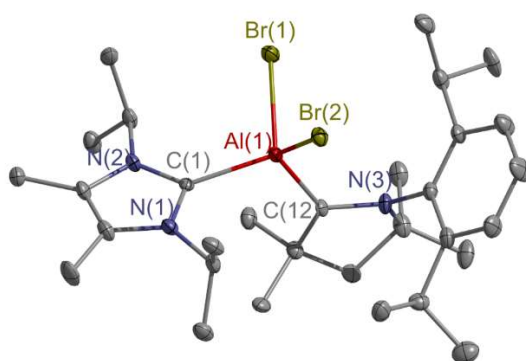

**Figure S16.** Molecular structure of **3** thermal ellipsoids at 30% probability level. The hydrogen atoms are omitted for clarity. Selected bond length (Å) and angles (°): Br(1)-Al(1) 2.3603(4), Br(2)-Al(1) 2.3462(4), Al(1)-C(12) 1.9411(12), Al(1)-C(1) 2.0783(12), N(1)-C(1) 1.3637(15), N(2)-C(1) 1.3598(15), N(3)-C(12) 1.4048(15); C(12)-Al(1)-C(1), 113.20(5), C(12)-Al(1)-Br(2) 113.75(4), C(1)-Al(1)-Br(2) 107.08(3), C(12)-Al(1)-Br(1) 112.89(4), C(1)-Al(1)-Br(1) 107.97(4), Br(2)-Al(1)-Br(1) 101.083(15), C(1)-N(1)-C(2) 110.77(10), N(2)-C(1)-N(1) 104.67(10), N(3)-C(12)-Al(1) 124.33(9).

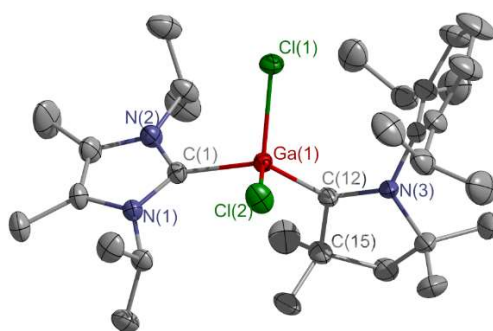

**Figure S17.** Molecular structure of **4** thermal ellipsoids at 30% probability level. The hydrogen atoms are omitted for clarity. Selected bond length (Å) and angles (°): Ga(1)-C(12) 1.932(3), Ga(1)-C(1) 2.059(3), Ga(1)-Cl(1) 2.2209(10), Ga(1)-Cl(2) 2.2492(12), N(1)-C(1) 1.351(4), N(2)-C(1) 1.350(4), N(3)-C(12) 1.383(4); C(12)-Ga(1)-C(1) 116.78(13), C(12)-Ga(1)-Cl(1) 114.70(10), C(1)-Ga(1)-Cl(1) 104.69(9), C(12)-Ga(1)-Cl(2) 112.54(11), C(1)-Ga(1)-Cl(2) 105.81(9), Cl(1)-Ga(1)-Cl(2) 100.68(5), N(2)-C(1)-N(1) 105.2(3), N(3)-C(12)-Ga(1) 125.0(2).

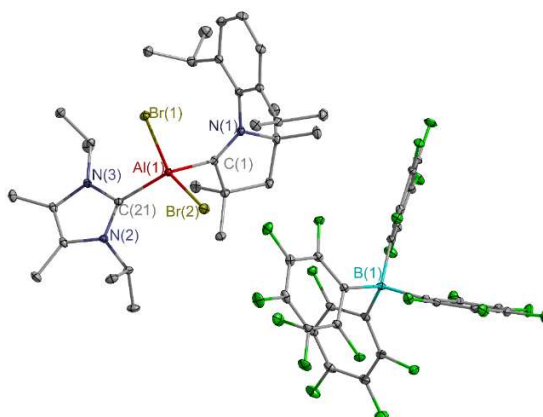

**Figure S18.** Molecular structure of **5** thermal ellipsoids at 30% probability level. The hydrogen atoms are omitted for clarity. Selected bond length (Å) and angles (°): Br(1)-Al(1) 2.2824(4), Br(2)-Al(1) 2.2934(5), Al(1)-C(21) 2.0471(13), Al(1)-C(1) 2.0549(13), N(1)-C(1) 1.3042(17); C(21)-Al(1)-C(1) 117.12(5), C(21)-Al(1)-Br(1) 105.91(4), C(1)-Al(1)-Br(1) 113.62(4), C(21)-Al(1)-Br(2) 113.63(4), C(1)-Al(1)-Br(2) 99.47(4), Br(1)-Al(1)-Br(2) 106.787(18), N(1)-C(1)-Al(1) 131.24(10), N(3)-C(21)-N(2) 105.19(11).

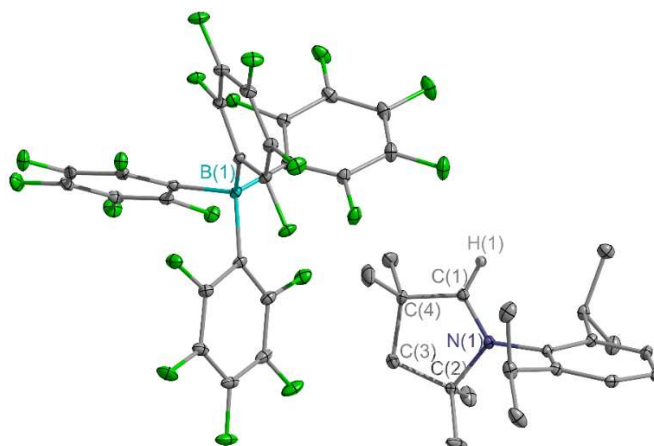

**Figure S19.** Molecular structure of **5S** thermal ellipsoids at 30% probability level. The hydrogen atoms are omitted for clarity. Selected bond length (Å) and angles (°): N(1)-C(1) 1.278(2), N(1)-C(2) 1.543(2), C(1)-C(4) 1.490(2), C(2)-C(3) 1.548(3), C(3)-C(4) 1.541(3); C(1)-N(1)-C(2) 112.39(14), N(1)-C(1)-C(4) 114.67(16).

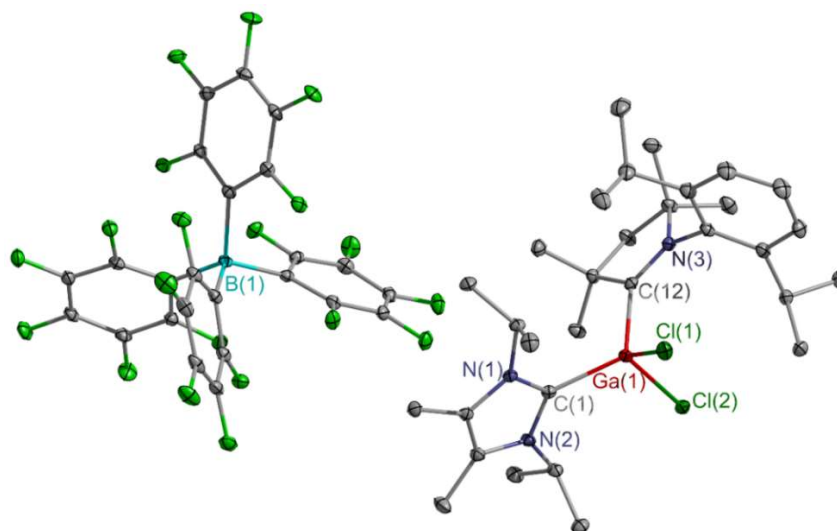

**Figure S20.** Molecular structure of **6** thermal ellipsoids at 30% probability level. The hydrogen atoms are omitted for clarity. Selected bond length (Å) and angles (°): Ga(1)-C(1) 2.0263(13), Ga(1)-C(12) 2.0367(12), Ga(1)-Cl(1) 2.1798(3), Ga(1)-Cl(2) 2.2042(3), N(3)-C(12) 1.2980(16); C(1)-Ga(1)-C(12) 117.59(5), C(1)-Ga(1)-Cl(1) 108.63(4), C(12)-Ga(1)-Cl(1) 114.22(4), C(1)-Ga(1)-Cl(2) 111.90(4), C(12)-Ga(1)-Cl(2) 96.92(3), Cl(1)-Ga(1)-Cl(2) 106.632(14), N(3)-C(12)-Ga(1) 129.76(9), N(1)-C(1)-N(2) 105.81(11).



#### 4. EPR measurement

**Experimental procedure.** For EPR measurements, 1 mM samples of **3** and **4** in toluene were prepared in a glovebox and frozen in custom 4 mm (OD) quartz EPR tubes. Continuous-wave (CW) X-band EPR spectra at 77 K ( $\sim 9.45$  GHz) were collected with a Bruker MS 5000 spectrometer. For **3** the spectrum was obtained with 100 kHz field modulation frequency, 5 G modulation amplitude, 0.5 mW microwave power and a scan time of 60 s, which was repeated three times and averaged. For **4**, the spectrum was obtained with 100 kHz field modulation frequency, 0.1 G modulation amplitude, 0.02 mW microwave power and a scan time of 300 s. An effective time constant of 0.05 sec was applied digitally to the  $\sim 30$  k point spectrum. The EPR data were processed and analysed in Matlab R2019b and simulated using the EasySpin package (v. 6.0.0-dev.34).<sup>7</sup>

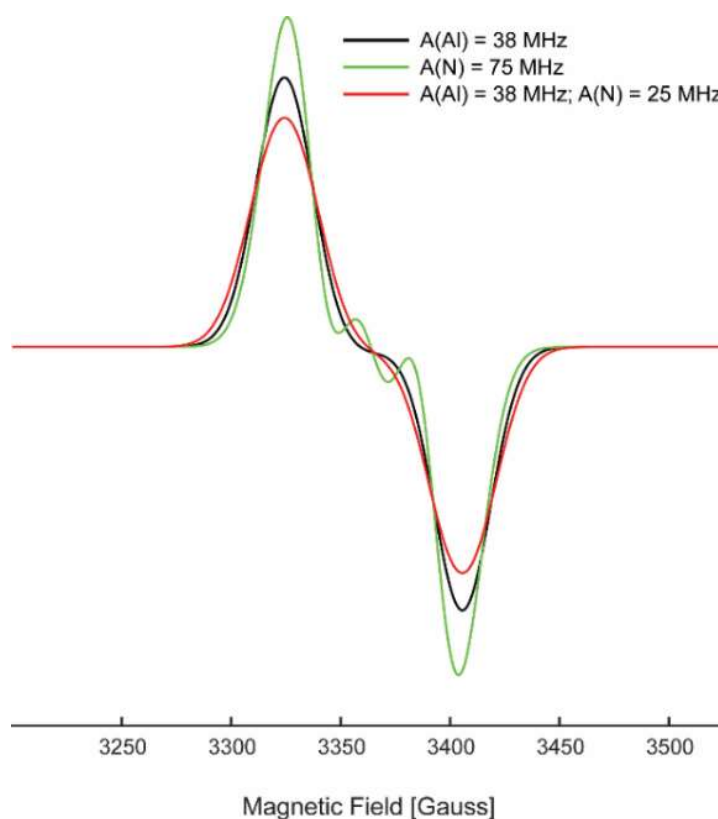

**Figure S21.** Simulated EPR spectra for various amounts of Al and N hyperfine coupling in the frozen solution regime. Simulations were obtained using a 27 Gauss peak-to-peak linewidth and a microwave frequency of 9.43 GHz.

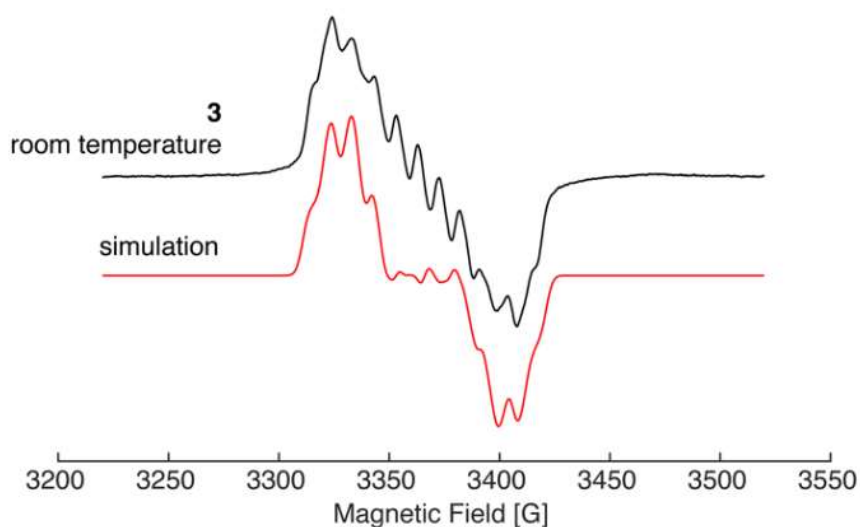

**Figure S22.** Room temperature EPR spectrum of **3**. Simulations were obtained with the following parameters:  $a_{iso}(^{27}\text{Al}) = 35.0$  MHz;  $a_{iso}(^{14}\text{N}) = 25.0$  MHz;  $a_{iso}(^{79}\text{Br}) = 10$  MHz;  $a_{iso}(^{81}\text{Br}) = 10$  MHz;  $lw = 6.6$  Gauss (fwhm). All isotopologues of bromine ( $^{79}\text{Br}$  and  $^{81}\text{Br}$ ) were calculated in their natural abundance weights. The weak isotropic bromine coupling is resemblant of the weak halide coupling observed in other carbene radicals coordinated to main group centers.<sup>8</sup>

## 5. Cyclic Voltammetry measurement

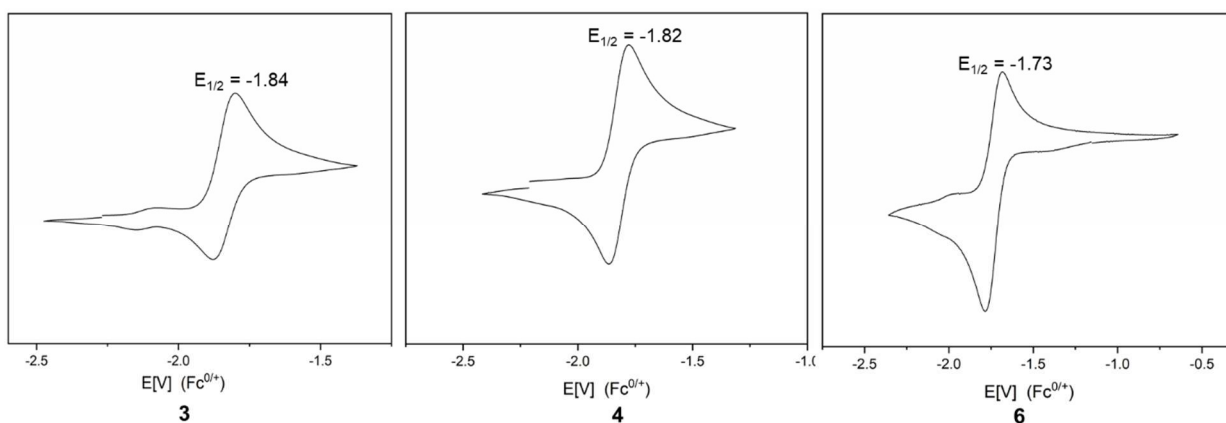

**Figure S23.** Cyclic voltammograms of **3**, **4** (1 mM in 1,2-difluorobenzene) and **6** (1 mM in THF) containing [*n*-Bu<sub>4</sub>N][B(3,5-(CF<sub>3</sub>)<sub>2</sub>-C<sub>6</sub>H<sub>3</sub>)<sub>4</sub>] (50 mM) as electrolyte at 100 mV s<sup>-1</sup> scan rate.

## 6. Computational Details

The ORCA quantum chemistry package version 4.0.x<sup>9-12</sup> was used for the DFT calculations of spin densities and Mulliken spin population. Unrestricted (UKS) geometry optimization of the radical species **3** and **4** was carried out at the BP86 level of theory<sup>13</sup> with def2- variants of Alrich's all-electron Gaussian triple- $\zeta$  valence polarized recontracted basis set (def2-TZVP)<sup>14</sup> and Weigend's "universal" Coulomb fitting basis (def2/J) on all atoms.<sup>15</sup> Single point energy calculations employed the TPSSH functional,<sup>16</sup> the resolution of identity (RI-J) algorithm for the computation of the Coulomb terms and the 'chain of spheres exchange' (COSX) algorithm for the calculation of the exchange terms.<sup>17</sup> A tight self-consistent field (SCF) convergence threshold of  $1 \times 10^{-8}$  au was chosen by use of the "TightSCF" keyword. An increased grid was used during the SCF iterations (Grid4), and for the final energy evaluation after SCF convergence Grid7 was used. Using ORCA version 5.0.0. the cations **5** and **6** were optimized on the M06-2X level of theory omitting the counter ions with the def2-SVP<sup>14</sup> basis set utilizing Grimmes empirical dispersion correction (D3zero).<sup>18</sup> For comparison **3** and **4** were reoptimized analogous. To accelerate the calculations with ultrafine grid settings, default "verytightSCF" and the "DefGrid3" with increased radical grid (7.0), the RI-J and COSX<sup>17</sup> approximation was utilized with the def-2J auxiliary basis sets.<sup>19</sup> Vibrational frequency calculations were carried out for all optimized structures to verify the stationary point as minima (no imaginary frequencies were found). Single point calculations were performed on optimized geometries using def2-TZVP basis set<sup>14</sup> for the M06-2X density functional and reported data refer to this level of theory. Natural bond orbital analysis was performed using the NBO 6.0 program.<sup>20</sup>

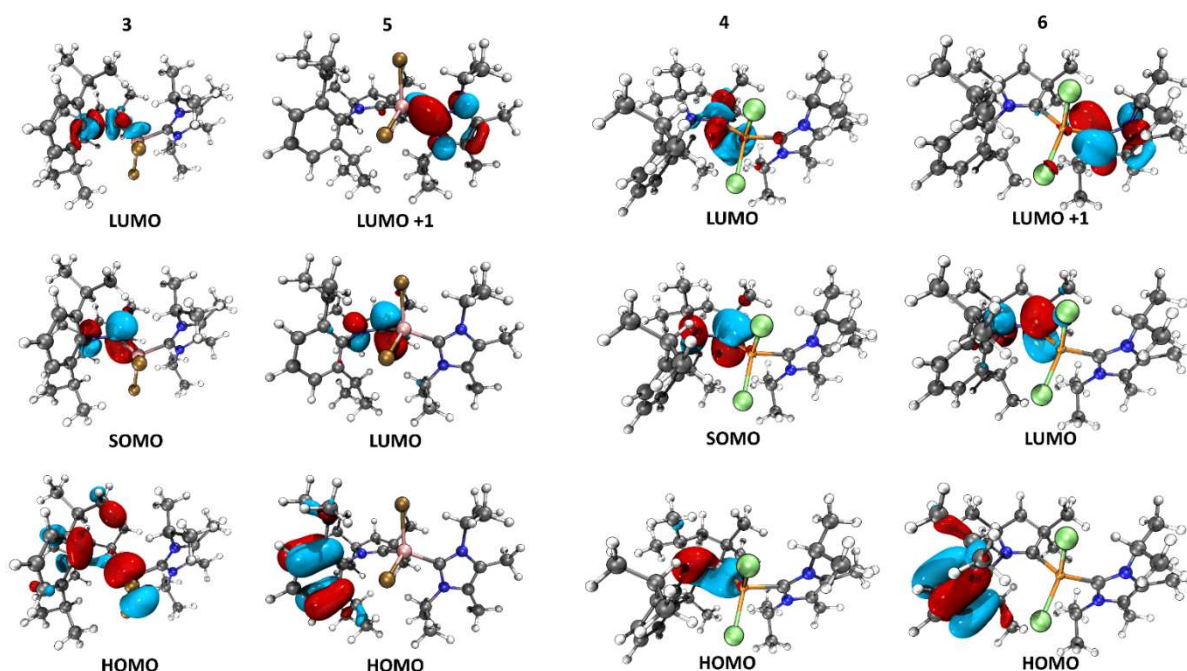

**Fig. S24.** Biorthogonalized HOMO, SOMO and LUMO of **3** and **4** as well as the HOMO, LUMO and LUMO+1 of **5** and **6**, isovalue 0.05. Biorthogonalizations were performed for the openshell systems using Multiwfn program 3.8.<sup>21</sup> VMD was developed by the Theoretical and Computational Biophysics Group in the Beckman Institute

for Advanced Science and Technology at the University of Illinois at Urbana-Champaign and used to plot grid-data.<sup>22</sup>

**Table S3.** Calculated X–Y bond lengths ( $r$ , Å) (exp.), X and Y, NPA atomic charges ( $q$ , |e|), Natural spin density ( $\rho_s$ , |e|), Wiberg bond indices (WBI), occupation numbers (ON, |e|) of the  $\sigma$  XY bonds according to NBO analysis for  $\alpha$  and  $\beta$  spin orbitals for the C-Al(Br)<sub>2</sub>-C skeleton of **3**.

| X-Y                  | $r(X-Y)$              | $q(X)$ | $q(Y)$ | $\rho_s(X)$ | $\rho_s(Y)$ | WBI  | ON( $\alpha$ ) <sup>[a]</sup> | ON( $\beta$ ) <sup>[a]</sup>                          |
|----------------------|-----------------------|--------|--------|-------------|-------------|------|-------------------------------|-------------------------------------------------------|
| Al-C <sub>CAAC</sub> | 1.9412<br>(1.941(1))  | 1.40   | -0.44  | 0.04        | 0.68        | 0.55 | 0.97<br>15.1/84.9             | 0.97<br>15.6/84.4                                     |
| Al-C <sub>NHC</sub>  | 2.1055<br>(2.078(1))  | 1.40   | 0.03   | 0.04        | 0.00        | 0.46 | 0.97<br>15.0/85.0             | 0.97<br>14.7/85.3                                     |
| Al-Br <sub>1</sub>   | 2.3708<br>(2.3603(4)) | 1.40   | -0.54  | 0.04        | 0.02        | 0.67 | 0.99<br>15.6/84.4             | 0.99<br>16.4/83.6                                     |
| Al-Br <sub>2</sub>   | 2.3407<br>(2.3462(4)) | 1.40   | -0.52  | 0.04        | 0.00        | 0.71 | 0.99<br>16.6/83.4             | 0.99<br>16.4/83.6                                     |
| C <sub>CAAC</sub> -N | 1.3950<br>(1.405(2))  | -0.44  | -0.48  | 0.68        | 0.20        | 1.23 | 0.99<br>35.4/64.6             | $\sigma$ 0.99<br>34.5/65.5<br>$\pi$ 0.96<br>23.0/77.0 |

[a]: Squared polarization coefficients  $c_x$  ( $|c_x|^2$ ) of the  $\sigma$ XY bond NBOs.

**Table S4.** Calculated X–Y bond lengths ( $r$ , Å) (exp.), X and Y, NPA atomic charges ( $q$ , |e|), Natural spin density ( $\rho_s$ , |e|), Wiberg bond indices (WBI), occupation numbers (ON, |e|) of the  $\sigma$  XY bonds according to NBO analysis for  $\alpha$  and  $\beta$  spin orbitals for the C-Ga(Cl)<sub>2</sub>-C skeleton of **4**.

| X-Y                  | $r(X-Y)$             | $q(X)$ | $q(Y)$ | $\rho_s(X)$ | $\rho_s(Y)$ | WBI  | ON( $\alpha$ ) <sup>[a]</sup> | ON( $\beta$ ) <sup>[a]</sup>                          |
|----------------------|----------------------|--------|--------|-------------|-------------|------|-------------------------------|-------------------------------------------------------|
| Ga-C <sub>CAAC</sub> | 1.9588<br>1.932(3))  | 1.42   | -0.39  | 0.03        | 0.69        | 0.61 | 0.97<br>17.9/82.1             | 0.97<br>18.7/81.3                                     |
| Ga-C <sub>NHC</sub>  | 2.1150<br>(2.059(3)) | 1.42   | 0.06   | 0.03        | 0.00        | 0.50 | 0.97<br>16.5/83.5             | 0.97<br>16.2/83.8                                     |
| Ga-Cl <sub>1</sub>   | 2.2379<br>(2.221(1)) | 1.42   | -0.58  | 0.03        | 0.00        | 0.63 | 0.99<br>15.2/84.8             | 0.99<br>15.0/85.0                                     |
| Ga-Cl <sub>2</sub>   | 2.2692<br>(2.249(2)) | 1.42   | -0.59  | 0.03        | 0.02        | 0.59 | 0.99<br>14.0/86.0             | 0.98<br>15.2/84.8                                     |
| C <sub>CAAC</sub> -N | 1.3902<br>(1.383(4)) | -0.39  | -0.48  | 0.69        | 0.21        | 1.23 | 0.99<br>35.4/64.4             | $\sigma$ 0.99<br>34.6/65.4<br>$\pi$ 0.96<br>23.4/76.6 |

[a]: Squared polarization coefficients  $c_x$  ( $|c_x|^2$ ) of the  $\sigma$ XY bond NBOs.

**Table S5.** Calculated X–Y bond lengths ( $r$ , Å) (exp.), X and Y, NPA atomic charges ( $q$ , |e|), Natural spin density ( $\rho_s$ , |e|), Wiberg bond indices (WBI), occupation numbers (ON, |e|) of the  $\sigma$  XY bonds according to NBO analysis for  $\alpha$  and  $\beta$  spin orbitals for the C-Al(Br)<sub>2</sub>-C skeleton of **5**.

| X-Y                  | r(X-Y)                | q(X) | q(Y)  | WBI  | ON <sup>[a]</sup>                                     |
|----------------------|-----------------------|------|-------|------|-------------------------------------------------------|
| Al-C <sub>CAAC</sub> | 2.0552<br>(2.055(1))  | 1.36 | 0.02  | 0.42 | Lp C 1.68 <sup>[b]</sup>                              |
| Al-C <sub>NHC</sub>  | 2.0647<br>(2.047(1))  | 1.36 | -0.03 | 0.49 | Lp C 1.65 <sup>[b]</sup>                              |
| Al-Br <sub>1</sub>   | 2.2895<br>(2.2824(4)) | 1.36 | -0.46 | 0.79 | 1.99<br>18.7/81.3                                     |
| Al-Br <sub>2</sub>   | 2.3171<br>(2.2934(5)) | 1.36 | -0.47 | 0.73 | 1.98<br>20.2/81.8                                     |
| C <sub>CAAC</sub> -N | 1.2971<br>(1.304(2))  | 0.02 | -0.34 | 1.62 | $\sigma$ 1.98<br>34.3/65.7<br>$\pi$ 1.96<br>28.6/71.4 |

[a]: Squared polarization coefficients  $c_x$  ( $|c_x|^2$ ) of the  $\sigma$ XY bond NBOs. [b]: The accepted lewis structure consisted of 3 parts, two carbenes and the AlBr<sub>2</sub>, but by second order perturbation theory analysis a strong interaction of the lone pair on the C<sub>CAAC</sub> and on the C<sub>NHC</sub> with the Lewis vacant orbital at Al was found with 154 and 180 kcal/mol, respectively.

**Table S6.** Calculated X–Y bond lengths ( $r$ , Å) (exp.), X and Y, NPA atomic charges ( $q$ , |e|), Natural spin density ( $\rho_s$ , |e|), Wiberg bond indices (WBI), occupation numbers (ON, |e|) of the  $\sigma$  XY bonds according to NBO analysis for  $\alpha$  and  $\beta$  spin orbitals for the C-Ga(Cl)<sub>2</sub>-C skeleton of **6**.

| X-Y                  | r(X-Y)                | q(X) | q(Y)  | WBI  | ON <sup>[a]</sup>                                     |
|----------------------|-----------------------|------|-------|------|-------------------------------------------------------|
| Ga-C <sub>CAAC</sub> | 2.0631<br>(2.037(1))  | 1.40 | 0.06  | 0.47 | 1.93<br>15.6/84.4                                     |
| Ga-C <sub>NHC</sub>  | 2.0699<br>(2.026(1))  | 1.40 | 0.01  | 0.54 | 1.94<br>18.1/81.9                                     |
| Ga-Cl <sub>1</sub>   | 2.1982<br>(2.1798(3)) | 1.40 | -0.53 | 0.69 | 1.97<br>16.6/83.5                                     |
| Ga-Cl <sub>2</sub>   | 2.2209<br>(2.2042(3)) | 1.40 | -0.54 | 0.65 | 1.97<br>16.1/83.9                                     |
| C <sub>CAAC</sub> -N | 1.2930<br>(1.298(2))  | 0.06 | -0.34 | 1.63 | $\sigma$ 1.98<br>34.4/65.6<br>$\pi$ 1.96<br>28.9/71.1 |

[a]: Squared polarization coefficients  $c_x$  ( $|c_x|^2$ ) of the  $\sigma$ XY bond NBOs.

**Table S7.** Cartesian coordinates of **3** [Å] for the optimized geometry at the M06-2X/def2-SVP level of theory.

|    |              |             |             |   |             |             |             |
|----|--------------|-------------|-------------|---|-------------|-------------|-------------|
| Br | 3.090632516  | 8.48986272  | 10.50250584 | C | 4.652587741 | 7.714559762 | 4.928178732 |
| Br | 1.363495424  | 8.139107197 | 7.209494885 | C | 4.057398944 | 6.722322274 | 4.147300051 |
| Al | 2.915204787  | 9.469195918 | 8.350525388 | H | 3.881696084 | 6.909211737 | 3.085535427 |
| N  | 1.390473658  | 12.02801301 | 7.547785832 | C | 3.690422477 | 5.499159266 | 4.69787953  |
| N  | 1.911910879  | 12.17207344 | 9.631927581 | H | 3.225332464 | 4.733164388 | 4.075277596 |
| N  | 5.414518138  | 8.52458783  | 7.107797962 | C | 3.923555163 | 5.259683997 | 6.044553567 |
| C  | 2.019515512  | 11.36440066 | 8.548665563 | H | 3.637358659 | 4.299038434 | 6.476774901 |
| C  | 0.871752111  | 13.22996608 | 7.999251528 | C | 4.501369546 | 6.231468324 | 6.870006235 |
| C  | 1.198978552  | 13.31853943 | 9.324534981 | C | 5.047731922 | 9.021913382 | 4.261814891 |
| C  | 1.24488354   | 11.49200071 | 6.178923524 | H | 5.642441219 | 9.594420366 | 4.98556528  |
| H  | 1.886612433  | 10.60406415 | 6.170441725 | C | 3.810444534 | 9.857271468 | 3.930081923 |
| C  | 1.772196019  | 12.44867286 | 5.115554544 | H | 4.096124368 | 10.82418112 | 3.485352212 |
| H  | 1.812383705  | 11.91165362 | 4.158265675 | H | 3.235681348 | 10.04461836 | 4.845800876 |
| H  | 2.790272102  | 12.78526302 | 5.355798124 | H | 3.158122208 | 9.328578243 | 3.217049077 |
| H  | 1.12518035   | 13.3234142  | 4.974650203 | C | 5.90445988  | 8.804893734 | 3.010678261 |
| C  | -0.179504424 | 11.01799305 | 5.912599845 | H | 5.326260536 | 8.327819548 | 2.205363784 |
| H  | -0.18926393  | 10.43757203 | 4.979475576 | H | 6.773157724 | 8.164050167 | 3.219755855 |
| H  | -0.88457625  | 11.85402285 | 5.801648377 | H | 6.269889788 | 9.769221007 | 2.626324611 |
| H  | -0.518285674 | 10.35511033 | 6.718623339 | C | 4.722704279 | 5.895505158 | 8.33330493  |
| C  | 2.435810223  | 11.82766045 | 10.9698583  | H | 4.986933339 | 6.828161899 | 8.851451678 |
| H  | 3.132363389  | 11.00602242 | 10.78348755 | C | 5.879293535 | 4.897858983 | 8.481496709 |
| C  | 1.327036714  | 11.28584085 | 11.86278974 | H | 5.601635044 | 3.925382853 | 8.045307763 |
| H  | 0.567574538  | 12.04968233 | 12.08672324 | H | 6.121293474 | 4.736488259 | 9.543143462 |
| H  | 1.762578608  | 10.94203239 | 12.81124941 | H | 6.788654961 | 5.238575127 | 7.965614294 |
| H  | 0.844233347  | 10.42300039 | 11.38490363 | C | 3.464142065 | 5.332976182 | 9.002274682 |
| C  | 3.239132079  | 12.95823545 | 11.60894418 | H | 2.596434524 | 5.985746747 | 8.838499868 |
| H  | 3.885485382  | 13.45639829 | 10.87205444 | H | 3.623854767 | 5.247217258 | 10.08735303 |
| H  | 3.886925355  | 12.52197063 | 12.3816785  | H | 3.223113102 | 4.32936047  | 8.618411322 |
| H  | 2.60827411   | 13.71103884 | 12.09775954 | C | 5.216724515 | 11.98674239 | 6.81922248  |
| C  | 0.137312121  | 14.23412608 | 7.17149053  | H | 5.122632131 | 11.66723587 | 5.770170484 |
| H  | 0.824088494  | 14.84749381 | 6.570713432 | H | 5.955880271 | 12.80368975 | 6.872385683 |
| H  | -0.421644173 | 14.90949793 | 7.829936807 | H | 4.243098225 | 12.39085495 | 7.14319219  |
| H  | -0.581831287 | 13.7637117  | 6.491446176 | C | 5.671717953 | 11.32290352 | 9.164179206 |
| C  | 0.880356515  | 14.4246728  | 10.27645312 | H | 6.406429159 | 12.13785012 | 9.269135808 |
| H  | 1.751699645  | 15.06619292 | 10.46876685 | H | 5.921143711 | 10.52938387 | 9.881107987 |
| H  | 0.519998972  | 14.04298409 | 11.23979302 | H | 4.687651268 | 11.73012646 | 9.443465019 |
| H  | 0.089660469  | 15.05357068 | 9.850887657 | C | 7.725497344 | 7.981800541 | 6.324350602 |
| C  | 4.669311686  | 9.62433396  | 7.533539632 | H | 7.509852033 | 8.334136915 | 5.306451213 |
| C  | 6.865609792  | 8.700848031 | 7.356878644 | H | 7.551791088 | 6.896163123 | 6.354707822 |
| C  | 6.99421784   | 10.23299916 | 7.268767559 | H | 8.788104112 | 8.16719134  | 6.538697499 |
| H  | 7.193880282  | 10.51685136 | 6.222825876 | C | 7.233814396 | 8.208521888 | 8.766116041 |
| H  | 7.829623213  | 10.61172525 | 7.876479895 | H | 7.242455919 | 7.112126683 | 8.810367854 |
| C  | 5.628737009  | 10.80807632 | 7.71607277  | H | 6.503956713 | 8.567253733 | 9.505727979 |
| C  | 4.861922088  | 7.474656102 | 6.307803049 | H | 8.235396608 | 8.567644999 | 9.047438553 |

**Table S8.** Cartesian coordinates of **4** [Å] for the optimized geometry at the M06-2X/def2-SVP level of theory.

|    |             |              |             |   |             |              |             |
|----|-------------|--------------|-------------|---|-------------|--------------|-------------|
| Br | 6.889297208 | 2.278913983  | 9.427138981 | H | 11.74776647 | 2.025149109  | 6.551060765 |
| Br | 10.58207479 | 1.572520804  | 9.237307522 | C | 9.065727948 | 2.56599252   | 4.415832675 |
| Al | 8.62159214  | 1.772548807  | 8.018434821 | H | 9.621157135 | 2.414973467  | 3.478829369 |
| N  | 9.116542011 | 4.56925357   | 6.907080756 | H | 8.295874839 | 3.330962249  | 4.238013362 |
| N  | 8.731968076 | -1.113127447 | 6.86673037  | H | 8.56567962  | 1.619680221  | 4.668077883 |
| N  | 7.001350604 | -0.029190677 | 6.173067708 | C | 10.83817792 | 6.379969283  | 6.660832387 |
| C  | 9.2113453   | 3.284269205  | 6.757035051 | H | 11.45698375 | 6.902171958  | 5.917353029 |
| C  | 10.05466352 | 2.965357299  | 5.527568464 | H | 11.50884444 | 5.868852653  | 7.362477605 |
| C  | 10.76644742 | 4.295011375  | 5.232540664 | H | 10.24682913 | 7.131108206  | 7.202130573 |
| H  | 11.77749824 | 4.26632813   | 5.664017468 | C | 9.039699624 | 6.160806002  | 4.967213367 |
| H  | 10.86957268 | 4.480660421  | 4.154687961 | H | 9.673732952 | 6.707733563  | 4.256196509 |
| C  | 9.947906475 | 5.39302839   | 5.92013738  | H | 8.439686493 | 6.896115102  | 5.518124746 |
| C  | 8.27266162  | 5.286255346  | 7.86074389  | H | 8.371749035 | 5.505475299  | 4.39345223  |
| C  | 8.809648862 | 5.691874432  | 9.102251664 | C | 8.124537482 | 0.095793508  | 6.920985104 |
| C  | 8.022799857 | 6.522224255  | 9.907939335 | C | 7.984197294 | -2.003113319 | 6.118511531 |
| H  | 8.418361941 | 6.84740523   | 10.87104974 | C | 6.889372858 | -1.312079951 | 5.666652757 |
| C  | 6.755962467 | 6.930839316  | 9.518746682 | C | 9.995205608 | -1.430861999 | 7.573112845 |
| H  | 6.169001173 | 7.588510538  | 10.16056095 | H | 10.43965933 | -0.45339662  | 7.773017955 |
| C  | 6.227683866 | 6.469282365  | 8.3211108   | C | 9.708258786 | -2.092962175 | 8.91432925  |
| H  | 5.212966994 | 6.754652324  | 8.03967842  | H | 9.231994923 | -3.076588126 | 8.79179594  |
| C  | 6.957383513 | 5.63274015   | 7.471951965 | H | 9.053961813 | -1.457921935 | 9.528581079 |
| C  | 10.13935395 | 5.228095134  | 9.682232733 | H | 10.6516604  | -2.233854605 | 9.459074532 |
| H  | 10.63589946 | 4.568627187  | 8.953473054 | C | 10.99701864 | -2.192137044 | 6.709477709 |
| C  | 11.07981874 | 6.39056891   | 10.0289009  | H | 10.79961708 | -3.269451926 | 6.666861876 |
| H  | 11.26739356 | 7.064665329  | 9.184658029 | H | 11.9932247  | -2.062179562 | 7.1533875   |
| H  | 12.04514531 | 5.995696167  | 10.37648112 | H | 11.03136406 | -1.793412989 | 5.685164153 |
| H  | 10.6620033  | 6.993668178  | 10.84798295 | C | 6.000304931 | 1.045069964  | 5.996540561 |
| C  | 9.882709448 | 4.41063314   | 10.95864031 | H | 6.496345299 | 1.951114062  | 6.380011428 |
| H  | 9.143901244 | 3.615214318  | 10.80034584 | C | 4.765338629 | 0.77234076   | 6.849387756 |
| H  | 9.510170866 | 5.06502243   | 11.76069063 | H | 4.044715236 | 1.591047841  | 6.725682042 |
| H  | 10.81761847 | 3.9483695    | 11.30595754 | H | 5.031351664 | 0.700604471  | 7.911455838 |
| C  | 6.223137727 | 5.088054506  | 6.250878025 | H | 4.26942116  | -0.158261671 | 6.543197956 |
| H  | 6.908353687 | 4.435604955  | 5.685697066 | C | 5.661491195 | 1.290797099  | 4.52561386  |
| C  | 5.033594793 | 4.236959515  | 6.718544735 | H | 6.545189287 | 1.205935843  | 3.879111683 |
| H  | 4.535353677 | 3.767172839  | 5.857223182 | H | 5.260996001 | 2.307958546  | 4.41975403  |
| H  | 4.285068256 | 4.868239366  | 7.218594732 | H | 4.89136732  | 0.600761575  | 4.160176263 |
| H  | 5.339009545 | 3.464760145  | 7.435875045 | C | 8.329211414 | -3.435874132 | 5.876472957 |
| C  | 5.694331498 | 6.179348629  | 5.310643173 | H | 7.443542585 | -3.96542879  | 5.508139455 |
| H  | 6.471854651 | 6.866086121  | 4.958281829 | H | 8.652613401 | -3.934454017 | 6.798470574 |
| H  | 4.923687773 | 6.780095713  | 5.814691579 | H | 9.124233946 | -3.548922083 | 5.126997356 |
| H  | 5.221856222 | 5.71843592   | 4.430744772 | C | 5.806721633 | -1.805817182 | 4.763270171 |
| C  | 11.05943547 | 1.82629349   | 5.719739714 | H | 5.933823391 | -1.431578866 | 3.737805627 |
| H  | 11.64513429 | 1.713235056  | 4.795740307 | H | 4.807150929 | -1.519897985 | 5.110172853 |
| H  | 10.55291236 | 0.867136443  | 5.907943312 | H | 5.841026602 | -2.900159129 | 4.721911687 |

**Table S9.** Cartesian coordinates of **5** [Å] for the optimized geometry at the M06-2X/def2-SVP level of theory.

|    |              |             |             |   |             |             |             |
|----|--------------|-------------|-------------|---|-------------|-------------|-------------|
| Ga | 3.075849246  | 6.660048657 | 8.110775302 | C | 4.619502262 | 9.968684523 | 6.70271753  |
| Cl | 1.542947245  | 7.860073801 | 7.006929241 | C | 4.094195851 | 10.99986405 | 5.91412503  |
| Cl | 3.21553347   | 7.582465767 | 10.17928246 | H | 3.821019816 | 11.94354275 | 6.390488049 |
| N  | 1.956104019  | 4.027346786 | 9.455240225 | C | 3.901330826 | 10.84228934 | 4.54943831  |
| N  | 1.597245208  | 4.071824654 | 7.331687454 | H | 3.487061057 | 11.65754915 | 3.954108834 |
| N  | 5.545106317  | 7.674371773 | 6.831009689 | C | 4.227328412 | 9.630927538 | 3.949003669 |
| C  | 2.174693699  | 4.760630225 | 8.341865252 | H | 4.05990665  | 9.498290411 | 2.877825248 |
| C  | 1.210765773  | 2.897106007 | 9.157839163 | C | 4.761204227 | 8.57823391  | 4.693853616 |
| C  | 0.986149552  | 2.923315084 | 7.807998237 | C | 4.766369573 | 10.21177752 | 8.193355758 |
| C  | 2.437328525  | 4.423589177 | 10.79536076 | H | 5.060692515 | 9.261829052 | 8.66139507  |
| H  | 3.17818545   | 5.203539575 | 10.59616562 | C | 3.439197506 | 10.6473357  | 8.825709122 |
| C  | 3.157448766  | 3.292289975 | 11.52364688 | H | 3.156597154 | 11.65807045 | 8.491415763 |
| H  | 3.834877507  | 2.751773069 | 10.84663857 | H | 3.531799314 | 10.66365038 | 9.921367055 |
| H  | 2.471742571  | 2.574725063 | 11.99147008 | H | 2.627137485 | 9.955684201 | 8.565182566 |
| H  | 3.765579653  | 3.734098638 | 12.32476737 | C | 5.847651979 | 11.26384607 | 8.471952441 |
| C  | 1.321204877  | 5.067770927 | 11.60695242 | H | 6.796014099 | 11.02922612 | 7.967045036 |
| H  | 0.922075248  | 5.938786111 | 11.07069056 | H | 6.039312565 | 11.34744583 | 9.552486418 |
| H  | 1.730224602  | 5.424309462 | 12.56237963 | H | 5.52284718  | 12.25215537 | 8.110524019 |
| H  | 0.504199851  | 4.362504695 | 11.82064457 | C | 5.038667613 | 7.262027197 | 3.989216567 |
| C  | 1.635871502  | 4.522581653 | 5.924831167 | H | 5.564396483 | 6.60939392  | 4.698922987 |
| H  | 2.383145872  | 5.327262537 | 5.928168014 | C | 5.914277712 | 7.419224436 | 2.742676869 |
| C  | 0.299471594  | 5.10410904  | 5.479675377 | H | 6.150923553 | 6.432697444 | 2.315934302 |
| H  | 0.430399399  | 5.578513272 | 4.4965617   | H | 6.859947127 | 7.93242252  | 2.967767602 |
| H  | -0.039628007 | 5.875046938 | 6.181014364 | H | 5.39975965  | 7.999829058 | 1.962530901 |
| H  | -0.469360963 | 4.324025436 | 5.380338015 | C | 3.710902214 | 6.588060381 | 3.625047443 |
| C  | 2.146703104  | 3.438800019 | 4.978904085 | H | 3.199770851 | 7.151185844 | 2.828151061 |
| H  | 2.444960999  | 3.919929811 | 4.037821633 | H | 3.039343825 | 6.570646089 | 4.495318307 |
| H  | 1.374929895  | 2.696939029 | 4.736920761 | H | 3.879227624 | 5.562162974 | 3.260483397 |
| H  | 3.025708031  | 2.923495013 | 5.389326265 | C | 5.392228105 | 4.187966942 | 6.584602703 |
| C  | 0.770394069  | 1.866163879 | 10.14483605 | H | 4.431872553 | 3.779390579 | 6.939614932 |
| H  | -0.032282006 | 1.261690054 | 9.706030951 | H | 6.143383901 | 3.382570393 | 6.643151298 |
| H  | 0.380113514  | 2.322470336 | 11.0631312  | H | 5.270632572 | 4.480173226 | 5.530020399 |
| H  | 1.588010595  | 1.186269054 | 10.42302707 | C | 5.864102046 | 4.91591227  | 8.906898462 |
| C  | 0.257683317  | 1.918616108 | 6.976769556 | H | 4.884740729 | 4.511013557 | 9.211993774 |
| H  | -0.399776195 | 2.396067715 | 6.240238025 | H | 6.117398776 | 5.727755026 | 9.600567765 |
| H  | -0.36735374  | 1.29331244  | 7.62531356  | H | 6.604836967 | 4.108176043 | 9.023224596 |
| H  | 0.948755165  | 1.255112619 | 6.437718199 | C | 7.397536493 | 8.021181599 | 8.44624392  |
| C  | 4.828561341  | 6.556365158 | 7.242423664 | H | 8.414538409 | 7.687136717 | 8.702044273 |
| C  | 7.003365972  | 7.514697985 | 7.05009405  | H | 6.697247834 | 7.651343693 | 9.207817871 |
| C  | 7.146264149  | 5.983709125 | 6.961391531 | H | 7.380814823 | 9.11757902  | 8.483164538 |
| H  | 8.004674409  | 5.613779495 | 7.542037307 | C | 7.830777988 | 8.237354919 | 5.994317696 |
| H  | 7.312246146  | 5.703387919 | 5.908365148 | H | 7.584814762 | 7.881951203 | 4.984572105 |
| C  | 5.800725589  | 5.393796072 | 7.445119583 | H | 8.899881338 | 8.055489202 | 6.177321136 |
| C  | 4.972775204  | 8.751508359 | 6.083236765 | H | 7.653264049 | 9.322354859 | 6.029486042 |



**Table S10.** Cartesian coordinates of **6** [Å] for the optimized geometry at the M06-2X/def2-SVP level of theory.

|    |              |             |             |   |              |             |             |
|----|--------------|-------------|-------------|---|--------------|-------------|-------------|
| Ga | 2.599923192  | 12.38025435 | 13.81162665 | C | 4.367711563  | 13.2391837  | 10.07718314 |
| Cl | 3.774619511  | 10.7821613  | 12.86397855 | C | 4.778407922  | 12.40430141 | 9.034778916 |
| Cl | 0.446564716  | 11.84051695 | 13.87584896 | H | 5.829247719  | 12.40037473 | 8.741188383 |
| N  | 4.686721617  | 12.96043573 | 15.94722509 | C | 3.88485892   | 11.56642335 | 8.380560016 |
| N  | 2.772175809  | 12.66786994 | 16.90117881 | H | 4.227535076  | 10.9289448  | 7.564935092 |
| N  | 2.517023619  | 14.2164353  | 11.3845358  | C | 2.562491798  | 11.51717506 | 8.796722243 |
| C  | 3.377687151  | 12.73725056 | 15.6963109  | H | 1.874801229  | 10.81895718 | 8.317607241 |
| C  | 4.916431847  | 13.00893268 | 17.31181987 | C | 2.085428334  | 12.33110342 | 9.830017365 |
| C  | 3.700906453  | 12.81366861 | 17.91643606 | C | 5.454127226  | 14.00547592 | 10.82332854 |
| C  | 5.718492076  | 13.06949949 | 14.8926701  | H | 4.981884362  | 14.61492212 | 11.61017671 |
| H  | 5.146415017  | 13.16428629 | 13.95638909 | C | 6.392441535  | 12.99938488 | 11.50604088 |
| C  | 6.549909634  | 11.79393463 | 14.81215163 | H | 6.961861826  | 12.43661612 | 10.75211013 |
| H  | 5.912103939  | 10.92886583 | 14.59070496 | H | 5.836856906  | 12.26707973 | 12.10575949 |
| H  | 7.094549135  | 11.61059303 | 15.74802251 | H | 7.123275668  | 13.52484469 | 12.13933391 |
| H  | 7.29029427   | 11.89226564 | 14.00719237 | C | 6.289325946  | 14.92643604 | 9.925549239 |
| C  | 6.566616371  | 14.33113406 | 15.04317436 | H | 6.858780064  | 14.3372313  | 9.192497098 |
| H  | 7.052839307  | 14.54575063 | 14.08225636 | H | 7.019359415  | 15.48116142 | 10.5330158  |
| H  | 7.362680338  | 14.20734881 | 15.7871019  | H | 5.685969172  | 15.65364086 | 9.37007671  |
| H  | 5.957735879  | 15.2032261  | 15.31899493 | C | 0.650472287  | 12.10832556 | 10.28688497 |
| C  | 1.321569568  | 12.41463753 | 17.07697094 | H | 0.427953064  | 12.79491881 | 11.11865864 |
| H  | 0.889218714  | 12.64914382 | 16.10080471 | C | 0.505398633  | 10.6728299  | 10.81794033 |
| C  | 1.062140579  | 10.93906028 | 17.34919906 | H | 0.57113187   | 9.952649915 | 9.988798758 |
| H  | -0.021323238 | 10.76469399 | 17.394206   | H | -0.472175701 | 10.54654416 | 11.30361793 |
| H  | 1.502328639  | 10.61361084 | 18.30279235 | H | 1.286144589  | 10.42301091 | 11.54732239 |
| H  | 1.470014659  | 10.31880846 | 16.53899046 | C | -0.375734254 | 12.32941117 | 9.168128538 |
| C  | 0.669912602  | 13.35449872 | 18.08698833 | H | -0.300958627 | 13.31940565 | 8.701764265 |
| H  | 1.027828638  | 14.38724399 | 17.96536798 | H | -1.392924573 | 12.21181382 | 9.568168584 |
| H  | 0.824801711  | 13.04372407 | 19.12673688 | H | -0.249468717 | 11.5788093  | 8.374396817 |
| H  | -0.41317441  | 13.35062991 | 17.90499597 | C | 1.033438812  | 15.25074309 | 14.43419593 |
| C  | 6.233280836  | 13.27016647 | 17.96677286 | H | 0.732010679  | 16.2480377  | 14.7859059  |
| H  | 7.045477805  | 12.68637101 | 17.51831809 | H | 1.453321688  | 14.7101612  | 15.29674813 |
| H  | 6.173096473  | 12.99312784 | 19.0252112  | H | 0.14166284   | 14.71182399 | 14.08734522 |
| H  | 6.506330556  | 14.33361665 | 17.91734224 | C | 3.362017092  | 16.0034463  | 13.90728044 |
| C  | 3.399880261  | 12.76110995 | 19.3781245  | H | 4.139484691  | 16.15125253 | 13.14363028 |
| H  | 2.732463078  | 11.92601838 | 19.62384551 | H | 3.766365519  | 15.34959823 | 14.69505889 |
| H  | 2.935853199  | 13.68986166 | 19.73709338 | H | 3.135964398  | 16.97944686 | 14.36051276 |
| H  | 4.331715858  | 12.6148887  | 19.93581582 | C | 0.966309251  | 15.39594342 | 9.814651401 |
| C  | 2.463975448  | 14.0937714  | 12.6705858  | H | 0.617845541  | 16.39228108 | 9.50774066  |
| C  | 2.059512922  | 15.57848826 | 10.85758686 | H | 0.109792922  | 14.84656578 | 10.22544777 |
| C  | 1.521554554  | 16.230431   | 12.13955637 | H | 1.340763452  | 14.87383652 | 8.923358887 |
| H  | 1.807948284  | 17.28896137 | 12.20512216 | C | 3.228556852  | 16.33315261 | 10.23682338 |
| H  | 0.423211233  | 16.18156096 | 12.14348811 | H | 3.619114512  | 15.79074608 | 9.366212182 |
| C  | 2.069635039  | 15.40763624 | 13.31814045 | H | 4.045714023  | 16.51118209 | 10.94809159 |
| C  | 2.999073929  | 13.22363227 | 10.4290049  | H | 2.860597661  | 17.30840289 | 9.889934654 |

**Table S11.** Cartesian coordinates of **3** [Å] optimized at the BP86/def2-TZVP level of theory.

|    |                   |                   |                   |
|----|-------------------|-------------------|-------------------|
| Al | 0.02414569006580  | 0.07088943954349  | 0.00475363013462  |
| Br | -0.04294338170184 | 2.08747517554463  | 1.27236008901115  |
| Br | -0.07672368733614 | -1.62255026204246 | 1.62090672470825  |
| N  | -2.14918500857929 | -1.29130153125892 | -1.68252733974259 |
| N  | -2.68862745240979 | 0.78614433874108  | -1.40490840380577 |
| N  | 2.88321813575152  | 0.05018608860355  | -0.59321369559606 |
| C  | -1.70937680796202 | -0.12354607661099 | -1.12533184794371 |
| C  | -3.39663926935251 | -1.12453291407563 | -2.27873538391806 |
| C  | -3.73976293364751 | 0.19429086769534  | -2.10018379686937 |
| C  | -1.36504007756654 | -2.55001279297285 | -1.63643594718232 |
| H  | -0.38981076140405 | -2.23620384320659 | -1.23393184610062 |
| C  | -1.13376189078855 | -3.13150798115960 | -3.03142770843427 |
| H  | -0.35003470867663 | -3.89609217100135 | -2.96363302840036 |
| H  | -0.79507831821977 | -2.36292064734796 | -3.73633220713968 |
| H  | -2.03040293799561 | -3.61714247870863 | -3.43485656661654 |
| C  | -1.98087780263979 | -3.55804228567979 | -0.66860038657546 |
| H  | -1.28557659931603 | -4.39834984350590 | -0.53983504017253 |
| H  | -2.93085440357107 | -3.96272980002167 | -1.04408839117383 |
| H  | -2.13928955736692 | -3.10107355539354 | 0.31495085479575  |
| C  | -2.61057052684509 | 2.20707023866625  | -0.99128359218536 |
| H  | -1.57805108423718 | 2.32155855746257  | -0.63951215586529 |
| C  | -3.51750584460987 | 2.48303708196481  | 0.20560542624870  |
| H  | -4.58420355073178 | 2.39705867555841  | -0.04517762904915 |
| H  | -3.33325965564407 | 3.50338321277314  | 0.56772754080593  |
| H  | -3.28385618853370 | 1.79230065332425  | 1.02562628183234  |
| C  | -2.80960634705266 | 3.17314204891441  | -2.15887264385904 |
| H  | -2.22761113869463 | 2.86009852856237  | -3.03635501019713 |
| H  | -2.44484809301732 | 4.16282510876229  | -1.85263096666262 |
| H  | -3.86075749088217 | 3.28480149686322  | -2.45225446986674 |
| C  | -4.17568444168556 | -2.17936935729164 | -2.98754812349628 |
| H  | -3.79063351101156 | -2.36970771760595 | -4.00003093627635 |
| H  | -5.21914190181210 | -1.85602536622255 | -3.08911934434703 |
| H  | -4.17593991368806 | -3.13165439712907 | -2.44402313996793 |
| C  | -4.97425777941147 | 0.89033728837047  | -2.56169155268471 |
| H  | -4.79852275733068 | 1.49316761904954  | -3.46465155303676 |
| H  | -5.38752618245905 | 1.55328392038561  | -1.79173345978179 |
| H  | -5.74362356337498 | 0.14774434491719  | -2.80700859240344 |
| C  | 1.59273375959836  | 0.09296055635602  | -1.12685024279362 |
| C  | 3.84956086780640  | 0.88291954264535  | -1.38467556343933 |
| C  | 3.19691240336855  | 0.80358472649327  | -2.77796922856598 |
| H  | 3.55079058618734  | -0.11074708099895 | -3.27974335573376 |
| H  | 3.46384969756002  | 1.66066756548811  | -3.41232697848398 |
| C  | 1.67051422875423  | 0.69343424034233  | -2.53573248307614 |
| C  | 3.31619420765346  | -0.89413737582611 | 0.39058474389474  |
| C  | 3.39864193747531  | -2.26948675729818 | 0.04931745049731  |
| C  | 3.95818962146565  | -3.16183910838757 | 0.96877992335000  |
| H  | 4.04306847983248  | -4.21660845312842 | 0.70104307400970  |
| C  | 4.41644132193418  | -2.73365583237530 | 2.21237209632237  |
| H  | 4.86201090087684  | -3.44405335850813 | 2.91063149754574  |
| C  | 4.27064208540981  | -1.39760024551695 | 2.56407489982317  |
| H  | 4.58156127106397  | -1.06574603493048 | 3.55616474300926  |
| C  | 3.70983567469169  | -0.46494709884976 | 1.68112941231571  |
| C  | 2.89284909656881  | -2.82636997220224 | -1.27086482329965 |
| H  | 2.34837504752407  | -2.01735278817734 | -1.77618307694286 |
| C  | 1.89387901833840  | -3.96707544862085 | -1.02192703737838 |

|   |                   |                   |                   |
|---|-------------------|-------------------|-------------------|
| H | 1.45131582374081  | -4.30319811204534 | -1.97124032839669 |
| H | 1.09566294107812  | -3.64231132724300 | -0.34056278042975 |
| H | 2.38394817671470  | -4.83964297644320 | -0.56574800526934 |
| C | 4.02844771827480  | -3.30427629990030 | -2.18779337241931 |
| H | 4.60853074466433  | -4.11013266917837 | -1.71312087908674 |
| H | 4.72614435665761  | -2.49160814127860 | -2.42967817582794 |
| H | 3.62243250263840  | -3.69377549768161 | -3.13424557030463 |
| C | 3.48467340320031  | 0.94868033957421  | 2.18385565249507  |
| H | 2.96029276333036  | 1.50229379228984  | 1.39421111425166  |
| C | 4.80667176985799  | 1.66376449104977  | 2.50650014991658  |
| H | 5.31197157490797  | 1.18275319429187  | 3.35785628998846  |
| H | 4.62375872722306  | 2.71460785218424  | 2.77677582046774  |
| H | 5.50634105148134  | 1.64312425520504  | 1.65903380338347  |
| C | 2.57166106311752  | 0.94305102431703  | 3.42214257970948  |
| H | 1.63800955455825  | 0.40349578861342  | 3.22113695897523  |
| H | 2.31429180205917  | 1.97295632860804  | 3.70884532081312  |
| H | 3.06921447425690  | 0.46422439239128  | 4.27921849801722  |
| C | 1.02660846716568  | -0.22933420900814 | -3.58697743238402 |
| H | 1.46163670043024  | -1.23752790468097 | -3.55107790985462 |
| H | 1.16883686874496  | 0.17232619206749  | -4.60418724470236 |
| H | -0.05548923514164 | -0.31180487326329 | -3.40954351348693 |
| C | 0.95789820087754  | 2.05917149575494  | -2.63795575803946 |
| H | 1.08107160415668  | 2.49180778125996  | -3.64450517865779 |
| H | 1.32461248140826  | 2.78032082164482  | -1.89938305181213 |
| H | -0.12004900899770 | 1.93015320745979  | -2.46220671263904 |
| C | 5.26407096431554  | 0.31205868431880  | -1.36385622473617 |
| H | 5.29303525071497  | -0.71011864241905 | -1.76024014238403 |
| H | 5.66899830111243  | 0.28988343733063  | -0.34304054556124 |
| H | 5.92228945092855  | 0.94196620396377  | -1.97909738878225 |
| C | 3.87717279901245  | 2.33776309083517  | -0.87372413099906 |
| H | 4.49127004126110  | 2.43077035719080  | 0.02851508562361  |
| H | 2.86799744434785  | 2.69165858117247  | -0.63114695056380 |
| H | 4.30650952853053  | 2.99869288864621  | -1.64147303454450 |

**Table S12.** Cartesian coordinates of **4** [Å] optimized at the BP86/def2-TZVP level of theory.

|    |                   |                   |                   |
|----|-------------------|-------------------|-------------------|
| Ga | 0.07066106163470  | -0.10306892056856 | -0.00760424040625 |
| Cl | -0.00596043189805 | 1.54672575990004  | 1.49713769863161  |
| Cl | 0.25051524254535  | -1.99427370660849 | 1.24710930111784  |
| N  | -2.74414737185907 | -1.07691013078556 | -0.99603904761675 |
| N  | -2.41759800989637 | 1.02578341149779  | -1.40005987347573 |
| N  | 2.85706315145978  | 0.10311765384071  | -0.87856199478150 |
| C  | -1.81997424262555 | -0.08389866618072 | -0.88242098552348 |
| C  | -3.92615106442446 | -0.59211764270291 | -1.55479640494957 |
| C  | -3.71879538585741 | 0.74191866285356  | -1.81241718049721 |
| C  | -2.48875759262246 | -2.46700802020083 | -0.54731531060234 |
| C  | -2.75795908740134 | -3.49559665664553 | -1.64502383817422 |
| C  | -3.20495937298996 | -2.75771800638341 | 0.76959387793481  |
| C  | -1.73245736454683 | 2.33899695879293  | -1.47927879612512 |
| C  | -2.27264939110518 | 3.31473811046243  | -0.43644824828099 |
| C  | -1.74177328139246 | 2.90949037296042  | -2.89710080532231 |
| C  | -5.14929771400176 | -1.39993636345671 | -1.82400551163492 |
| C  | -4.66714459538531 | 1.71336338491457  | -2.42750351796287 |
| C  | 1.53291291983399  | -0.00549328879358 | -1.29524609776678 |
| C  | 3.79032707012073  | -0.67694258685970 | -1.75622911678268 |
| C  | 2.98488268087033  | -0.70326491456476 | -3.07156638342802 |
| C  | 1.48805770718756  | -0.66911537296466 | -2.66989101722495 |
| C  | 3.31662062765498  | 1.09741925576665  | 0.04462270958097  |
| C  | 3.77595200873682  | 0.73074558739104  | 1.33087606454769  |
| C  | 4.31925115744055  | 1.72105778273170  | 2.16098703566271  |
| C  | 4.38780020038480  | 3.04919722967090  | 1.75827556215986  |
| C  | 3.88164912938063  | 3.41024449768584  | 0.51202957492660  |
| C  | 3.33979337715352  | 2.45741452353174  | -0.35612646603106 |
| C  | 3.65424733686293  | -0.67864670464520 | 1.87792809217722  |
| C  | 2.81294135714411  | -0.69458103918917 | 3.16551536780713  |
| C  | 5.03276892330206  | -1.30838578152929 | 2.13716627985831  |
| C  | 2.77033103763598  | 2.93457080708874  | -1.68002030598840 |
| C  | 3.81486014787285  | 3.62741677273825  | -2.56760435089205 |
| C  | 1.57856740093781  | 3.87037365180988  | -1.42327369303311 |
| C  | 0.67362716953056  | 0.17132716123554  | -3.67154648843267 |
| C  | 0.85757206124323  | -2.07845388496646 | -2.63716179388402 |
| H  | 2.38832200233036  | 2.05359822250653  | -2.21120990710789 |
| H  | -0.69042178775161 | 2.10427400134705  | -1.22015413253101 |
| H  | 3.12002193719342  | -1.28022412515758 | 1.13080760147289  |
| H  | -1.41394572109098 | -2.48045148606051 | -0.32923585181648 |
| H  | 3.22581924719367  | 0.20218782472431  | -3.65039183049345 |
| H  | 3.23439685909888  | -1.57482189870805 | -3.69297733378629 |
| C  | 3.99946087594576  | -2.10083392937726 | -1.20585367946277 |
| H  | 3.05140670351324  | -2.54073535525829 | -0.87361887358871 |
| H  | 4.43351479782620  | -2.74669827271564 | -1.98383254579070 |
| H  | 4.68501772149086  | -2.09715486812403 | -0.35119758970113 |
| C  | 5.14280105812522  | 0.01110263932153  | -1.91436874230359 |
| H  | 5.78534042938222  | -0.58862107672553 | -2.57469991886847 |
| H  | 5.03413440408544  | 1.01098167244833  | -2.35193988824379 |
| H  | 5.65051452824480  | 0.11625916371125  | -0.94580278583286 |
| H  | 1.04464148012905  | 1.20457880212238  | -3.71577253093773 |
| H  | 1.34197853703724  | -2.73629193256918 | -1.90701166390715 |
| H  | -0.38449231846356 | 0.19799998374365  | -3.37227443743264 |
| H  | -0.20425219380440 | -2.00594173553567 | -2.35993199871825 |
| H  | 0.72360586015475  | -0.26139121446449 | -4.68451820545549 |
| H  | 0.91047317043266  | -2.55401795722297 | -3.63026016082862 |

|   |                   |                   |                   |
|---|-------------------|-------------------|-------------------|
| H | 1.07184733522898  | 4.12095744499891  | -2.36759966612889 |
| H | 3.36835387208179  | 3.91864014786760  | -3.53070625057934 |
| H | 1.90908914749848  | 4.81306786048015  | -0.96208366810340 |
| H | 4.20306512030150  | 4.53964976556199  | -2.09062135084192 |
| H | 0.86377913395730  | 3.40103670463703  | -0.73440252505319 |
| H | 4.67259916953735  | 2.97302276456785  | -2.77474056102350 |
| H | 2.62704448366539  | -1.73057472959869 | 3.48298658484411  |
| H | 5.55597155632436  | -0.77884894719773 | 2.94801713043909  |
| H | 1.84216233757496  | -0.20942908224774 | 3.00809548093530  |
| H | 5.68062254936932  | -1.26550708429448 | 1.24993450165676  |
| H | 3.33254498659317  | -0.17431678330302 | 3.98478721225346  |
| H | 4.92806233181556  | -2.36167703876658 | 2.43760414967018  |
| H | 4.67855711889657  | 1.44085194073026  | 3.15257014806302  |
| H | 4.81610570504292  | 3.80479740402002  | 2.41900148661554  |
| H | 3.91132821311373  | 4.45679906156378  | 0.20228425771554  |
| H | -4.67197084823903 | 2.67616261608428  | -1.90210902131325 |
| H | -4.43492452122229 | 1.90808566079751  | -3.48478956966366 |
| H | -5.68548809791695 | 1.30743092524604  | -2.38442235367244 |
| H | -5.40424356601428 | -2.05654222688010 | -0.98299871647142 |
| H | -6.00153370516342 | -0.72973820540615 | -1.99160307370431 |
| H | -5.04294082870703 | -2.02858877592660 | -2.72020049294471 |
| H | -2.91690298860398 | -2.01785000395889 | 1.52699261231166  |
| H | -4.29908737735264 | -2.75951442636539 | 0.66386290863077  |
| H | -2.89583866434219 | -3.74604554228083 | 1.13533139384786  |
| H | -1.01654531279766 | 3.73167149538960  | -2.94312127066298 |
| H | -2.72000919254280 | 3.31756365551569  | -3.17881281931765 |
| H | -1.44291382484539 | 2.15468239547211  | -3.63511951768592 |
| H | -2.22897304594714 | 2.86760587071067  | 0.56332886445181  |
| H | -3.30252345959192 | 3.62759714839835  | -0.65838591331062 |
| H | -1.64158630382835 | 4.21380385177769  | -0.43004574317048 |
| H | -3.82610163344691 | -3.69533037637959 | -1.79693266510332 |
| H | -2.31700892015138 | -3.17980308205148 | -2.60039921781148 |
| H | -2.28257257928848 | -4.44218008199536 | -1.35476980212592 |

## 7. References

- 1 N. Kuhn and T. Kratz, *Synthesis* 1993, **1993**, 561.
- 2 a) P. Bissinger, H. Braunschweig, A. Damme, I. Krummenacher, A. K. Phukan, K. Radacki and S. Sugawara, *Angew. Chem., Int. Ed.* 2014, **53**, 7360; b) V. Lavallo, Y. Canac, C. Präsang, B. Donnadieu and G. Bertrand, *Angew. Chem., Int. Ed.* 2005, **44**, 5705.
- 3 A. El-Hellani, J. Monot, S. Tang, R. Guillot, C. Bour and V. Gandon, *Inorg. Chem.* 2013, **52**, 11493.
- 4 G. M. Sheldrick, *Acta Crystallogr.* 1990, **A46**, 467.
- 5 G. M. Sheldrick, SHELXL-2017, Program for the Refinement of Crystal Structures University of Göttingen, Göttingen (Germany) **2017**. (see also: G.M. Sheldrick (**2015**) "Crystal structure refinement with SHELXL", *Acta Cryst., C71*, 3-8).
- 6 shelXle, A Qt GUI for SHELXL, C. B. Hübschle, G. M. Sheldrick, B. Dittrich, *J. Appl. Cryst.* **2011**, *44*, 1281-1284.
- 7 S. Stoll and A. Schweiger, EasySpin, *J. Magn. Reson.* 2006, **178**, 42.
- 8 V. Nesterov, D. Reiter, P. Bag, P. Frisch, R. Holzner, A. Porzelt and S. Inoue, *Chem. Rev.*, 2018, **118**, 9678
- 9 F. Neese, *WIREs Comput. Mol. Sci.* 2018, **8**, 1.
- 10 F. Neese, F. Wennmohs, U. Becker and C. Riplinger, *J. Chem. Phys.* 2020, **152**, 224108.
- 11 F. Neese, *WIREs Comput. Mol. Sci.* 2012, **2**, 73.
- 12 U. Ekström, L. Visscher, R. Bast, A. J. Thorvaldsen and K. Ruud, *J. Chem. Theory Comput.*, 2010, **6**, 1971.
- 13 A. D. Becke, A. D., *Phys. Rev. A* 1988, **38**, 3098.
- 14 F. Weigend and R. Ahlrichs, *PCCP* 2005, **7**, 3297.
- 15 K. Eichkorn, F. Weigend, O. Treutler and R. Ahlrichs, *Theor. Chem. Acc.* 1997, **97**, 119.
- 16 V. N. Staroverov, G. E. Scuseria, J. Tao and J. P. Perdew, *J. Chem. Phys.* 2003, **119**, 12129.
- 17 F. Neese, F. Wennmohs, A. Hansen and U. Becker, *Chem. Phys.* 2009, **356**, 98.
- 18 Grimme, J. Antony, S. Ehrlich and H. Krieg, *J. Chem. Phys.*, 2010, **132**, 154104.
- 19 F. Weigend, *PCCP* 2006, **8**, 1057.
- 20 E. D. Glendening, J. K. Badenhoop, A. E. Reed, J. E. Carpenter, J. A. Bohmann, C. M. Morales, C. R. Landis and F. Weinhold. *NBO 6.0*; Theoretical Chemistry Institute, University of Wisconsin, Madison, WI, 2013. <https://nbo6.chem.wisc.edu/>
- 21 T. Lu and F. Chen, *J. Comput. Chem.* 2012, **33**, 580.
- 22 W. Humphrey, A. Dalke and K. Schulten, *J. Mol. Graph.* 1996, **14**, 33. <http://www.ks.uiuc.edu/Research/vmd/>
